# Supplementary material for: Constituents from the Seeds of Sophora Alopecuroides L
Source: PubMed Central journal article supplement (PMC7024312; doi:10.3390/molecules25020411), 2020-01-19
Supplement: molecules-25-00411-s001.pdf [file molecules-25-00411-s001.pdf]

## SUPPLEMENTARY MATERIAL

### Catalogue

|                                                                                                                     |    |
|---------------------------------------------------------------------------------------------------------------------|----|
| Figure S1. <sup>1</sup> H NMR (600 MHz, DMSO- <i>d</i> <sub>6</sub> ) spectrum of the new compound <b>1</b> .....   | 1  |
| Figure S2. <sup>13</sup> C NMR (150 MHz, DMSO- <i>d</i> <sub>6</sub> ) spectrum of the new compound <b>1</b> . .... | 1  |
| Figure S3. HSQC spectrum of the new compound <b>1</b> . ....                                                        | 2  |
| Figure S4. HMBC spectrum of the new compound <b>1</b> . ....                                                        | 2  |
| Figure S5. <sup>1</sup> H- <sup>1</sup> H COSY spectrum of the new compound <b>1</b> .....                          | 3  |
| Figure S6. NOESY spectrum of the new compound <b>1</b> .....                                                        | 3  |
| Figure S7. Enlarged NOESY spectrum of the new compound <b>1</b> . ....                                              | 4  |
| Figure S8. HRESIMS spectrum of the new compound <b>1</b> . ....                                                     | 4  |
| Figure S9. The chromatogram of the glucose standard and hydrolyzation product of <b>1</b> .....                     | 5  |
| Figure S10. <sup>1</sup> H NMR (600 MHz, CD <sub>3</sub> OD) spectrum of the new compound <b>2</b> . ....           | 5  |
| Figure S11. <sup>13</sup> C NMR (150 MHz, CD <sub>3</sub> OD) spectrum of the new compound <b>2</b> . ....          | 6  |
| Figure S12. HSQC spectrum of the new compound <b>2</b> . ....                                                       | 6  |
| Figure S13. HMBC spectrum of the new compound <b>2</b> . ....                                                       | 7  |
| Figure S14. <sup>1</sup> H- <sup>1</sup> H COSY spectrum of the new compound <b>2</b> .....                         | 7  |
| Figure S15. NOESY spectrum of the new compound <b>2</b> .....                                                       | 8  |
| Figure S16. Enlarged NOESY spectrum of the new compound <b>2</b> . ....                                             | 8  |
| Figure S17. HRESIMS spectrum of the new compound <b>2</b> .....                                                     | 9  |
| Figure S18. The chromatogram of the glucose standard and hydrolyzation product of <b>2</b> .....                    | 9  |
| Figure S19. <sup>1</sup> H NMR (600 MHz, CD <sub>3</sub> OD) spectrum of the new compound <b>3</b> . ....           | 10 |
| Figure S20. <sup>13</sup> C NMR (150 MHz, CD <sub>3</sub> OD) spectrum of the new compound <b>3</b> . ....          | 10 |
| Figure S21. HSQC spectrum of the new compound <b>3</b> . ....                                                       | 11 |
| Figure S22. HMBC spectrum of the new compound <b>3</b> . ....                                                       | 11 |
| Figure S23. <sup>1</sup> H- <sup>1</sup> H COSY spectrum of the new compound <b>3</b> .....                         | 12 |
| Figure S24. NOESY spectrum of the new compound <b>3</b> .....                                                       | 12 |
| Figure S25. Enlarged NOESY spectrum of the new compound <b>3</b> . ....                                             | 13 |
| Figure S26. HRESIMS spectrum of the new compound <b>3</b> .....                                                     | 13 |
| Figure S27. The chromatogram of the glucose standard and hydrolyzation product of <b>3</b> .....                    | 14 |
| Figure S28. <sup>1</sup> H NMR (600 MHz, CD <sub>3</sub> OD) spectrum of the new compound <b>4</b> . ....           | 14 |
| Figure S29. <sup>13</sup> C NMR (150 MHz, CD <sub>3</sub> OD) spectrum of the new compound <b>4</b> . ....          | 15 |
| Figure S30. HSQC spectrum of the new compound <b>4</b> . ....                                                       | 15 |
| Figure S31. HMBC spectrum of the new compound <b>4</b> . ....                                                       | 16 |
| Figure S32. NOESY spectrum of the new compound <b>4</b> .....                                                       | 16 |
| Figure S33. HRESIMS spectrum of the new compound <b>4</b> .....                                                     | 17 |
| Figure S34. <sup>1</sup> H NMR (600 MHz, CD <sub>3</sub> OD) spectrum of the new compound <b>5</b> . ....           | 17 |
| Figure S35. <sup>13</sup> C NMR (150 MHz, CD <sub>3</sub> OD) spectrum of the new compound <b>5</b> . ....          | 18 |
| Figure S36. HSQC spectrum of the new compound <b>5</b> . ....                                                       | 18 |
| Figure S37. HMBC spectrum of the new compound <b>5</b> . ....                                                       | 19 |
| Figure S38. NOESY spectrum of the new compound <b>5</b> .....                                                       | 19 |
| Figure S39. HRESIMS spectrum of the new compound <b>5</b> .....                                                     | 20 |

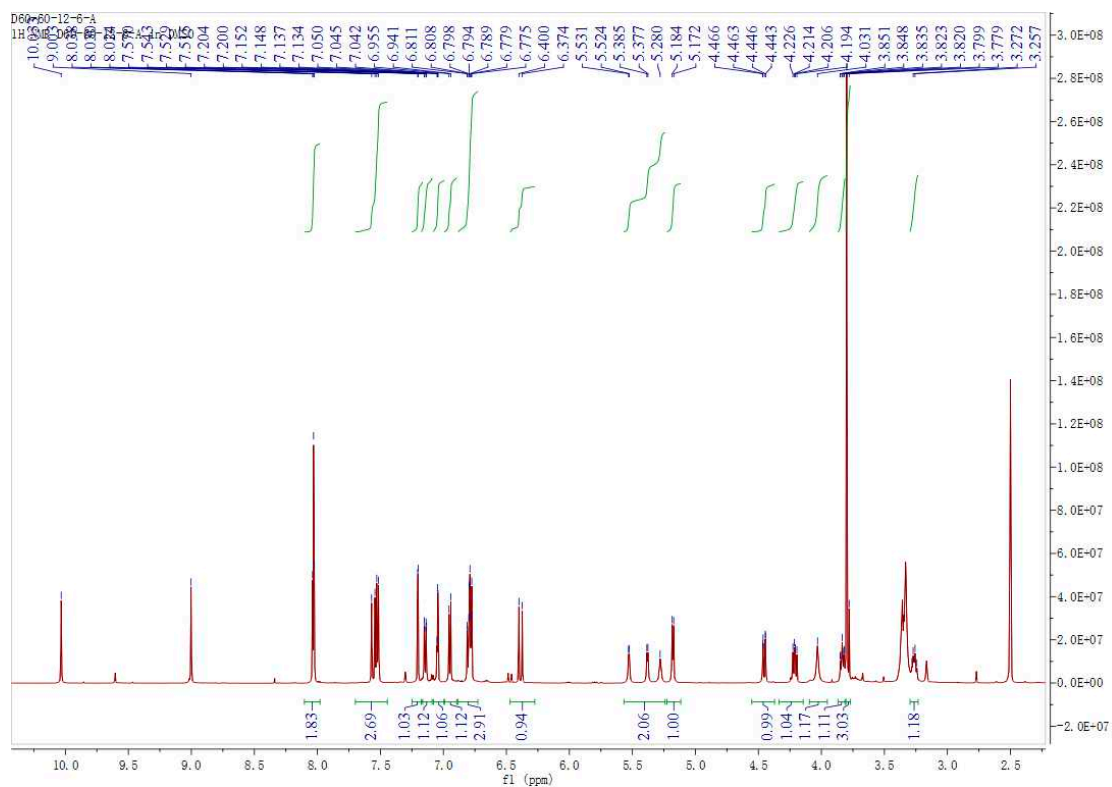

Figure S1.  $^1\text{H}$  NMR (600 MHz,  $\text{DMSO-}d_6$ ) spectrum of the new compound **1**.

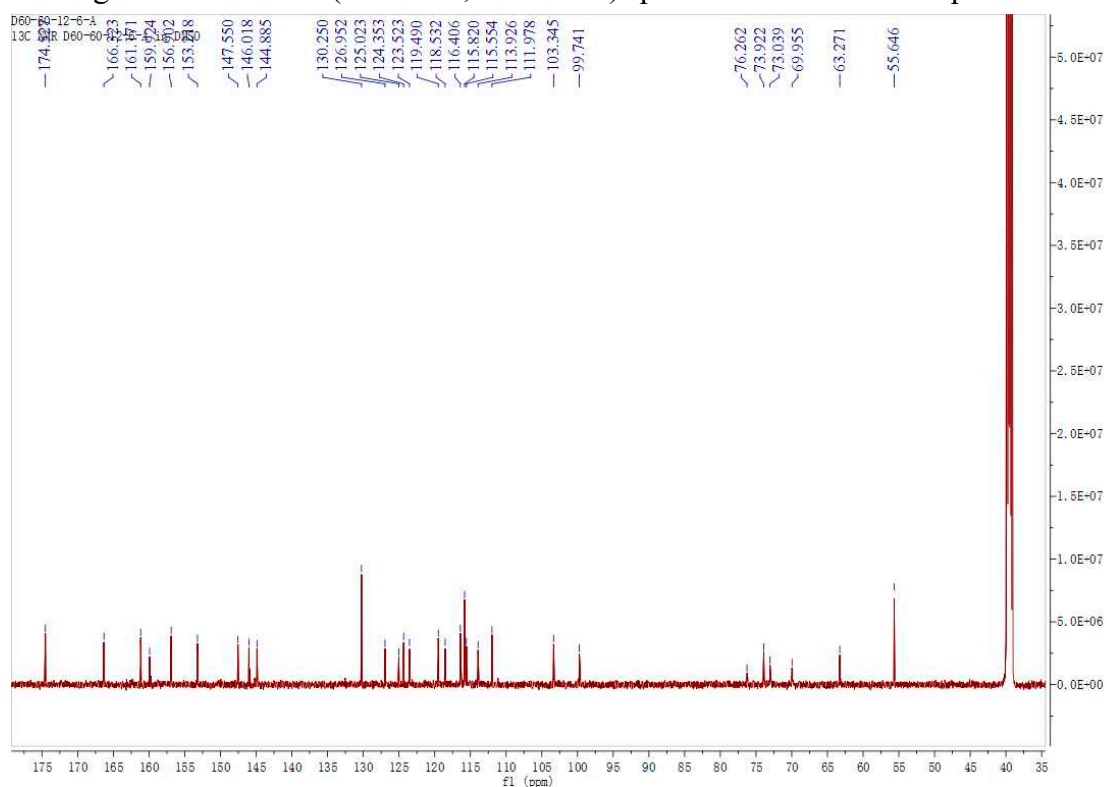

Figure S2.  $^{13}\text{C}$  NMR (150 MHz,  $\text{DMSO-}d_6$ ) spectrum of the new compound **1**.

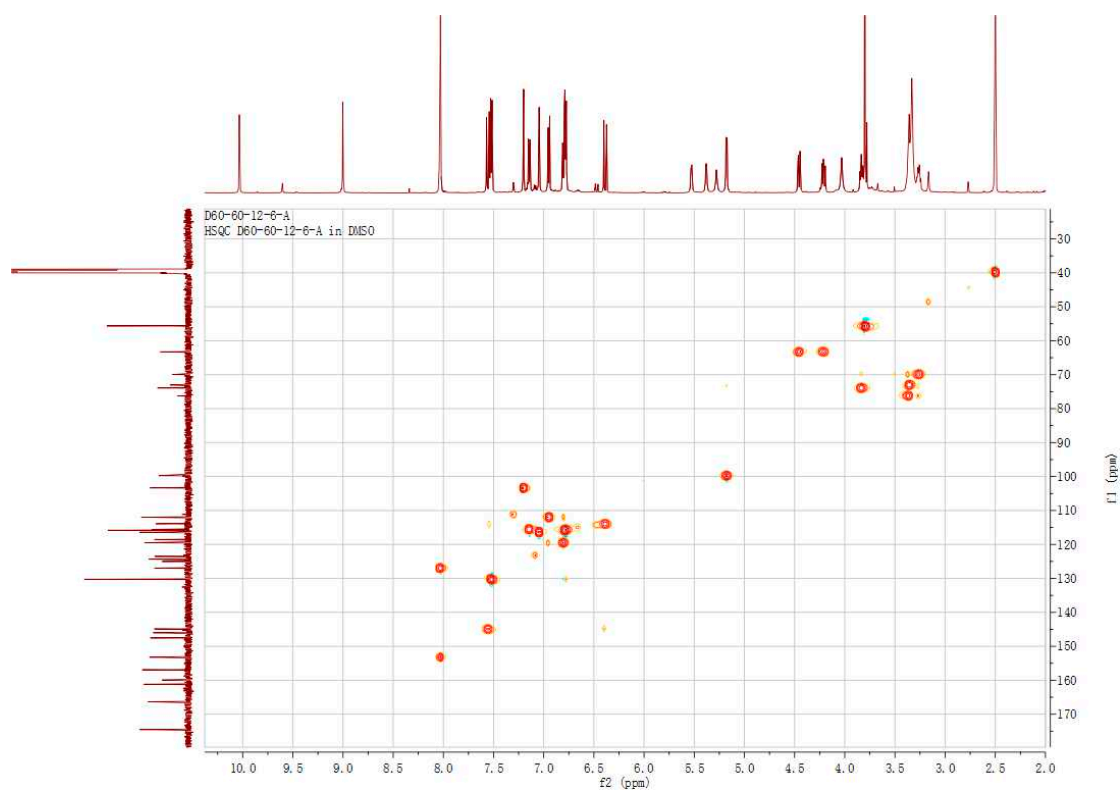

Figure S3. HSQC spectrum of the new compound **1**.

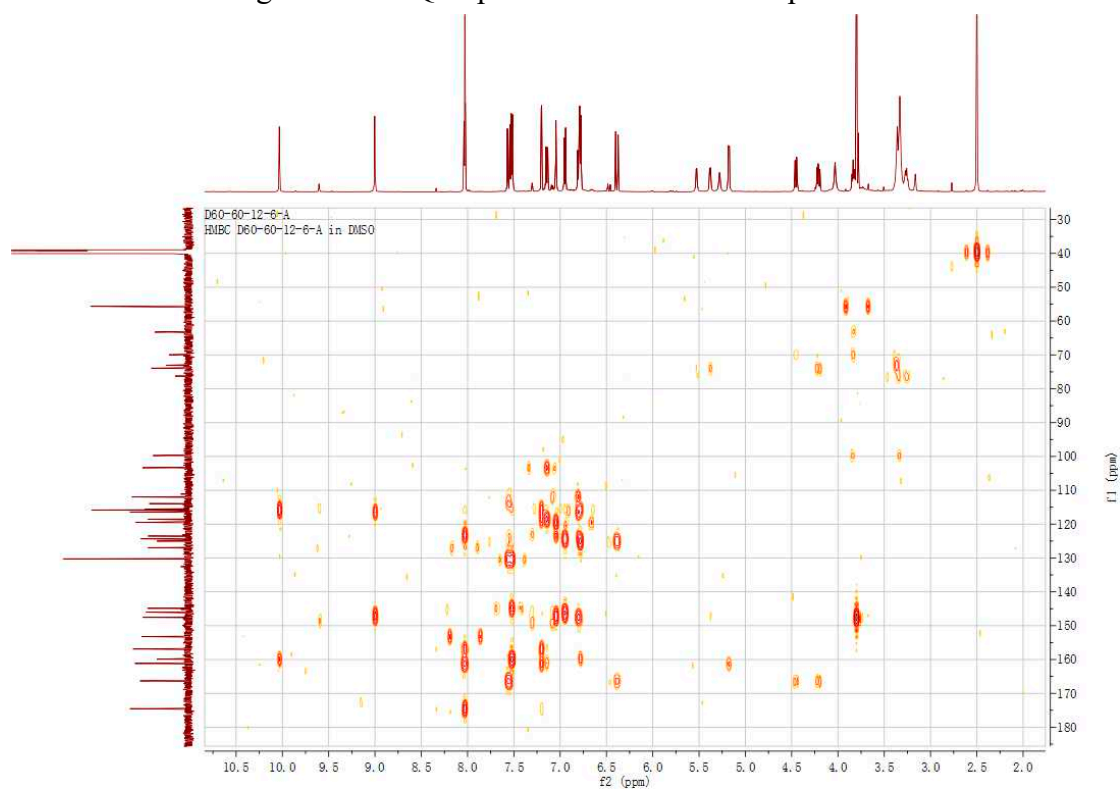

Figure S4. HMBC spectrum of the new compound **1**.

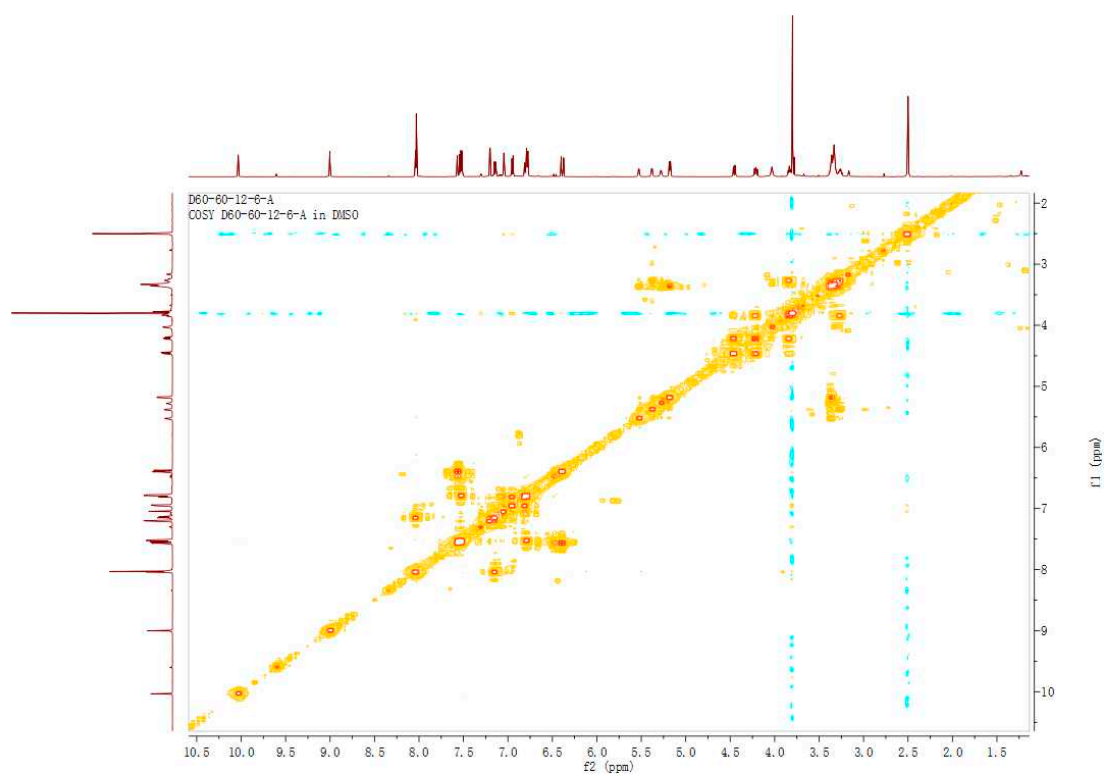

Figure S5.  $^1\text{H}$ - $^1\text{H}$  COSY spectrum of the new compound **1**.

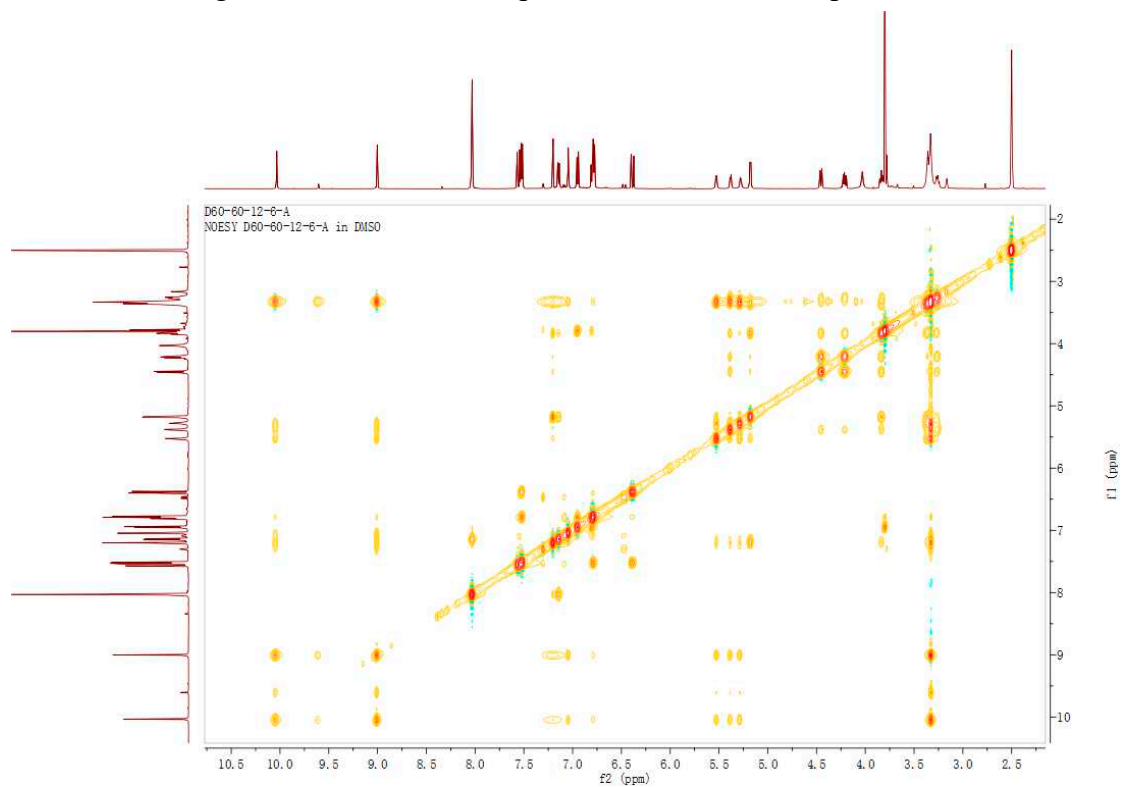

Figure S6. NOESY spectrum of the new compound **1**.

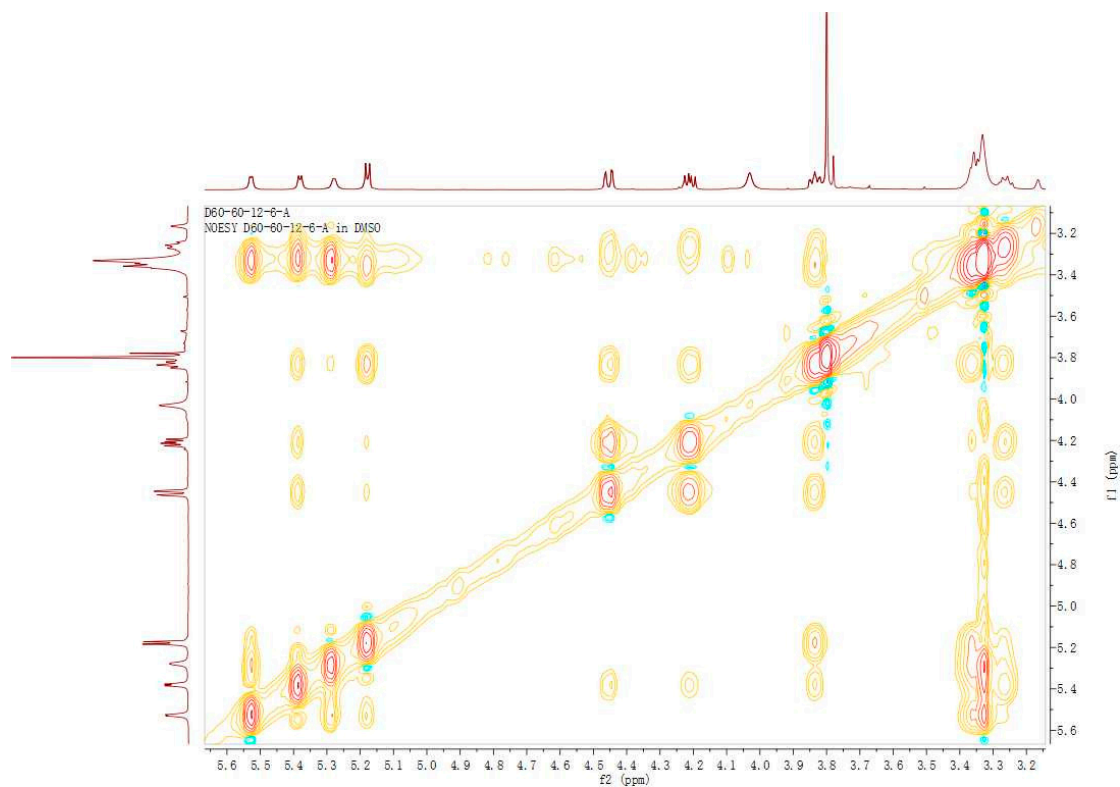

Figure S7. Enlarged NOESY spectrum of the new compound **1**.

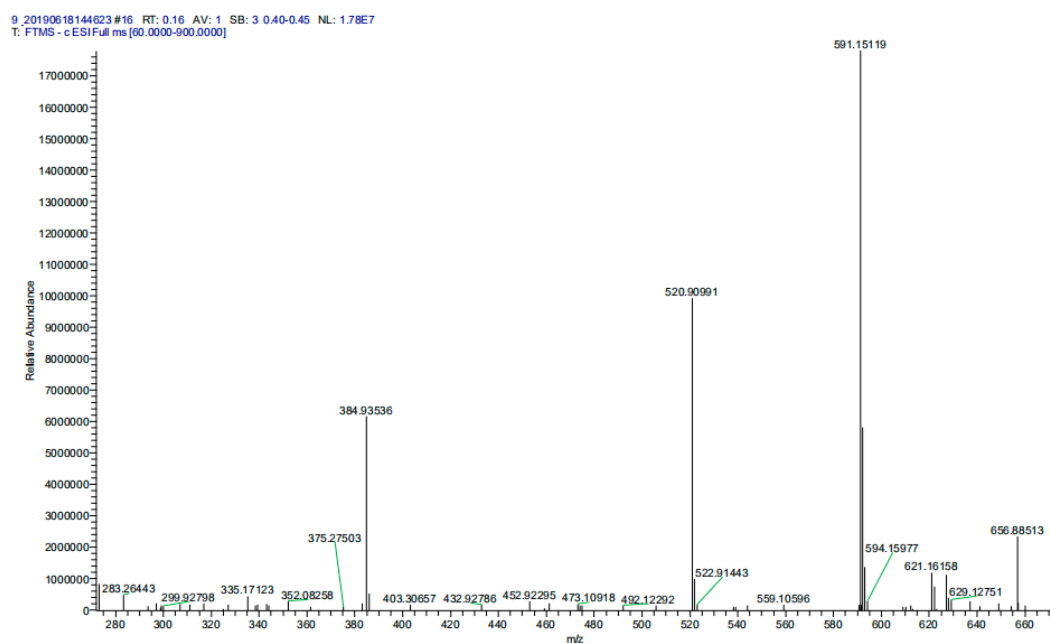

Figure S8. HRESIMS spectrum of the new compound **1**.

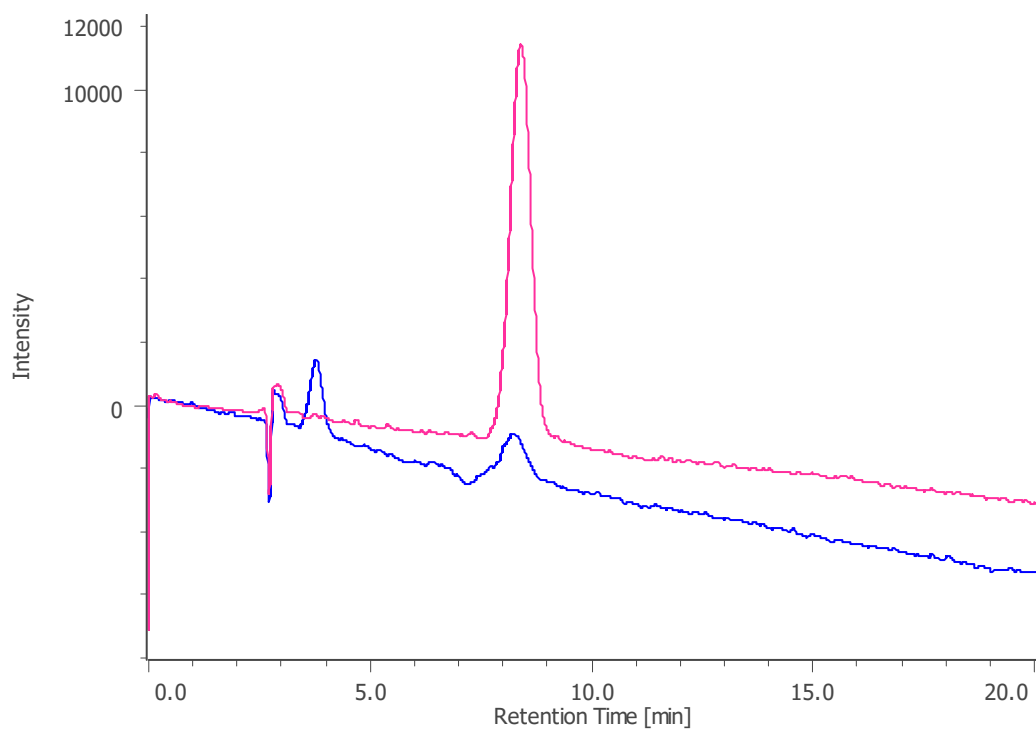

Figure S9. The chromatogram of the glucose standard and hydrolyzation product of **1**

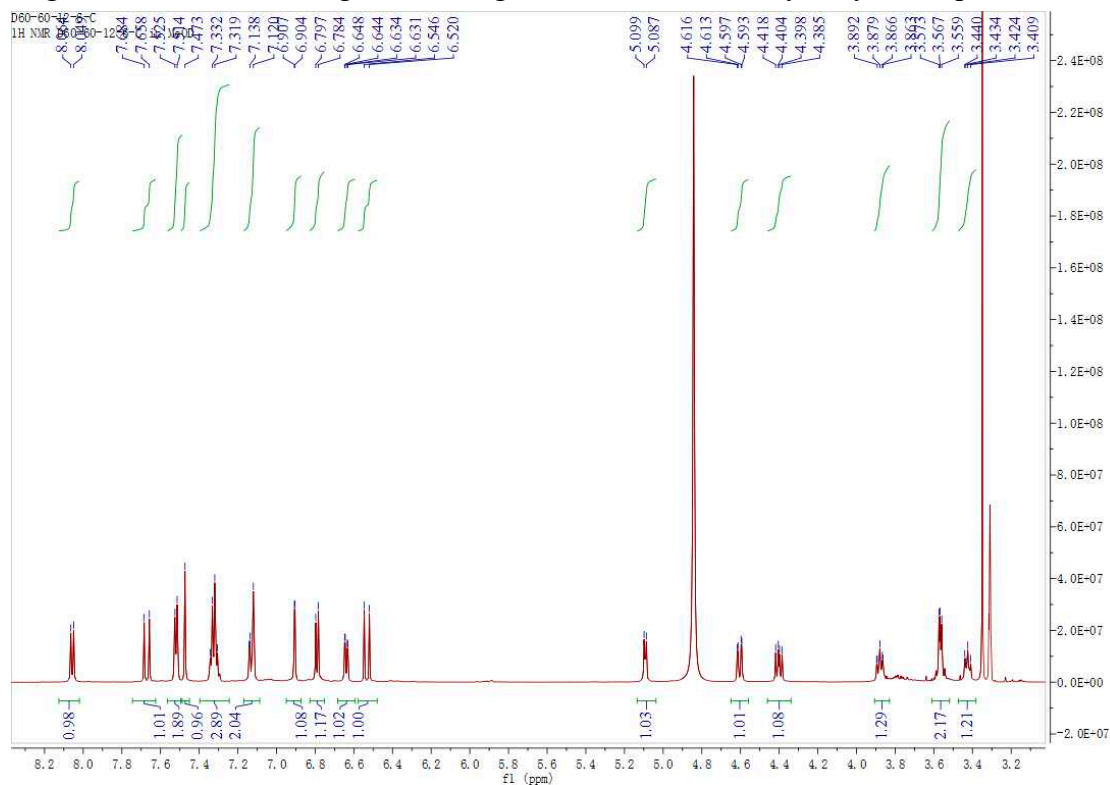

Figure S10.  $^1\text{H}$  NMR (600 MHz,  $\text{CD}_3\text{OD}$ ) spectrum of the new compound **2**.

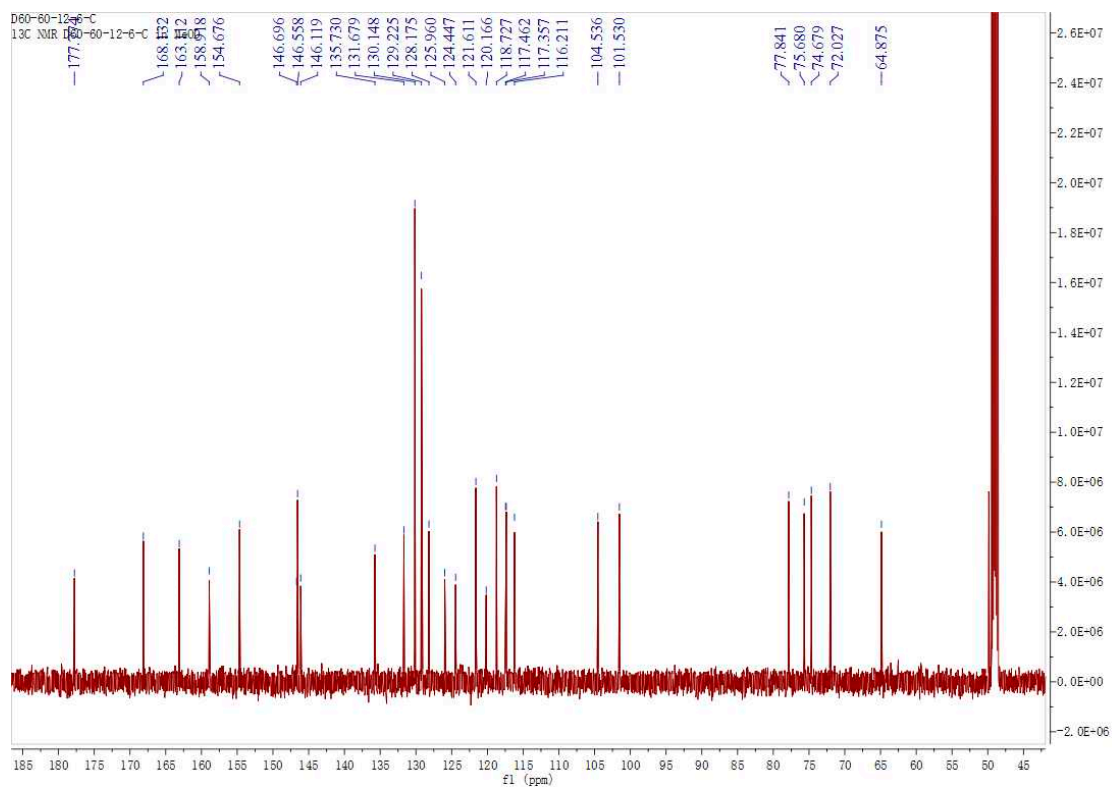

Figure S11.  $^{13}\text{C}$  NMR (150 MHz,  $\text{CD}_3\text{OD}$ ) spectrum of the new compound **2**.

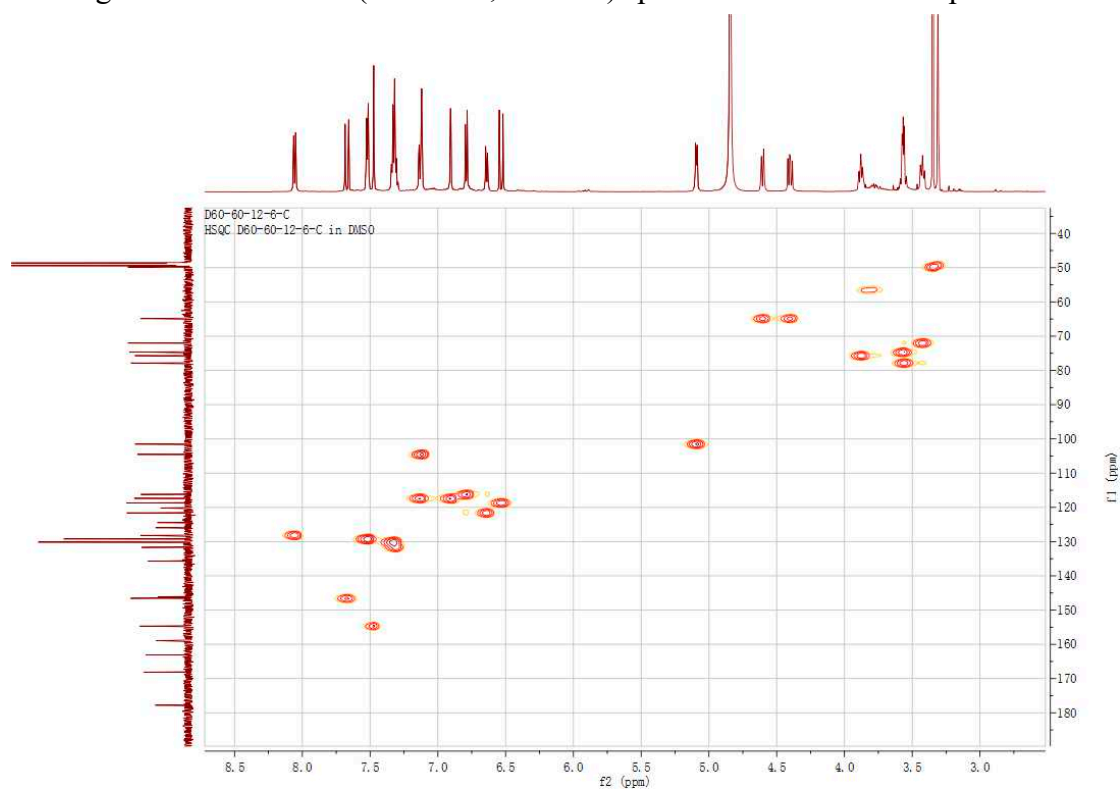

Figure S12. HSQC spectrum of the new compound **2**.

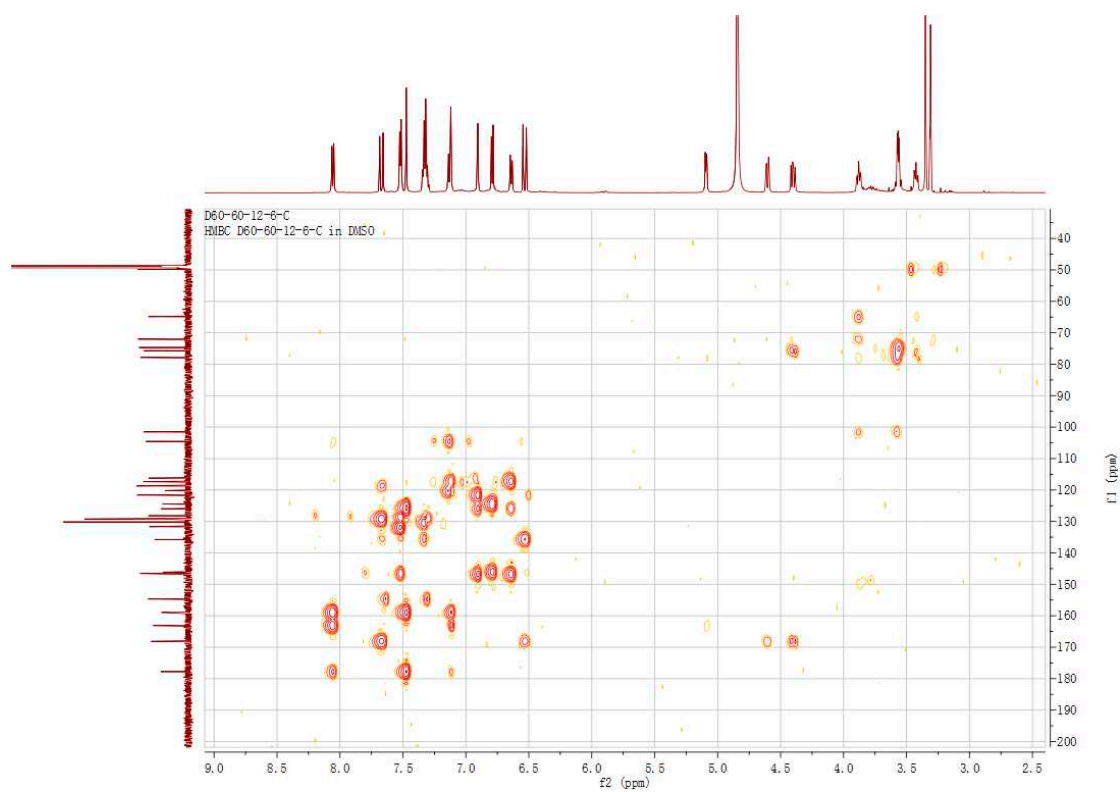

Figure S13. HMBC spectrum of the new compound **2**.

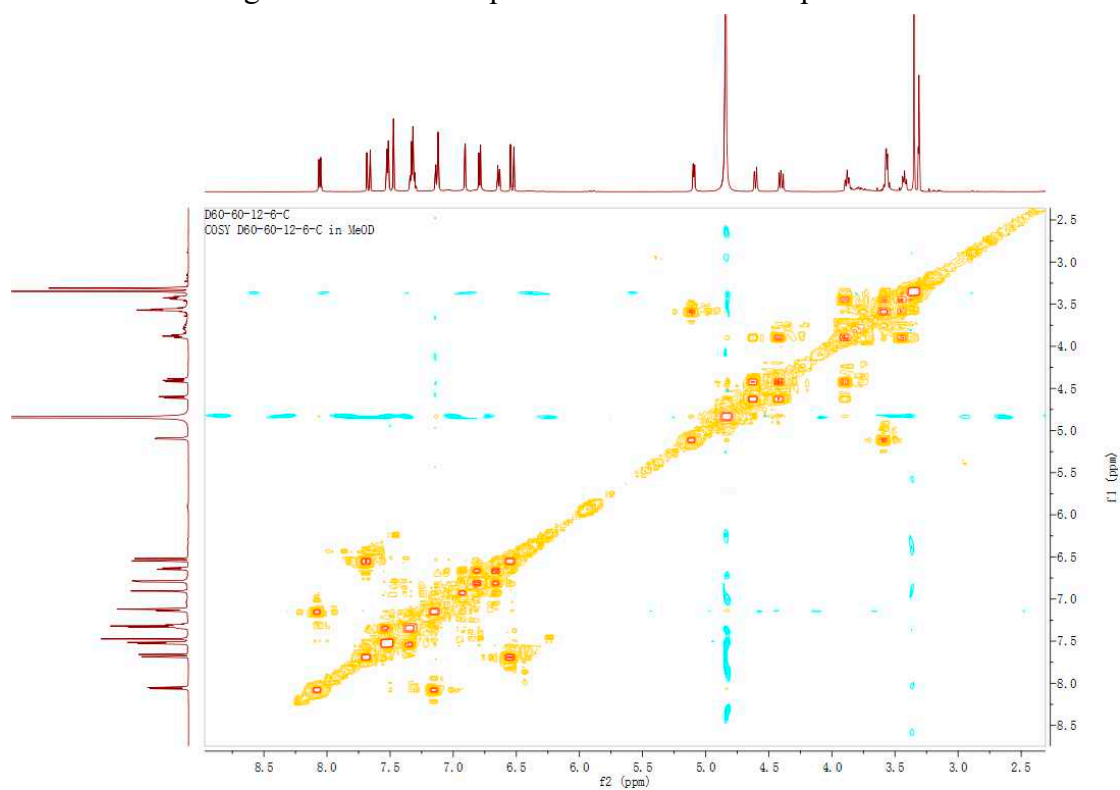

Figure S14.  $^1\text{H}$ - $^1\text{H}$  COSY spectrum of the new compound **2**.



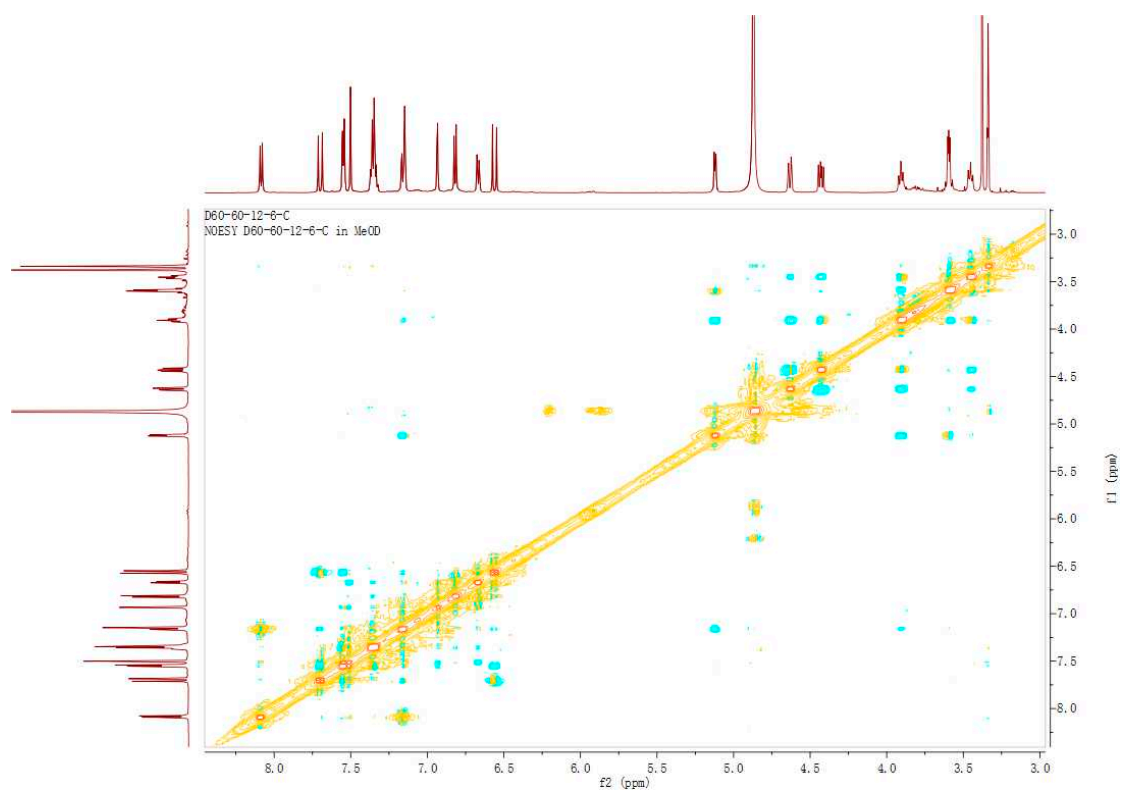

Figure S15. NOESY spectrum of the new compound **2**.

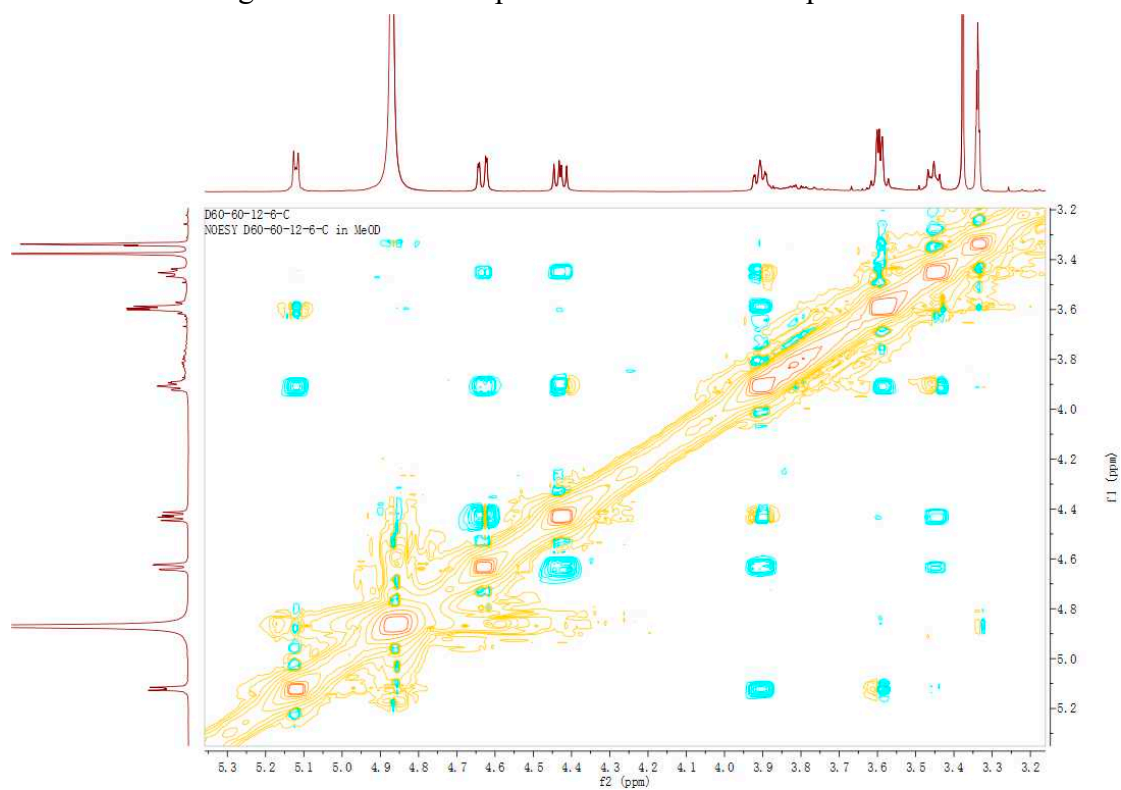

Figure S16. Enlarged NOESY spectrum of the new compound **2**.

6\_20190618144303 #16 RT: 0.16 AV: 1 SB: 6 0.43-0.50, 0.53-0.56 NL: 1.99E7  
T: FTMS - c-ESIFull.ms [60.0000-900.0000]

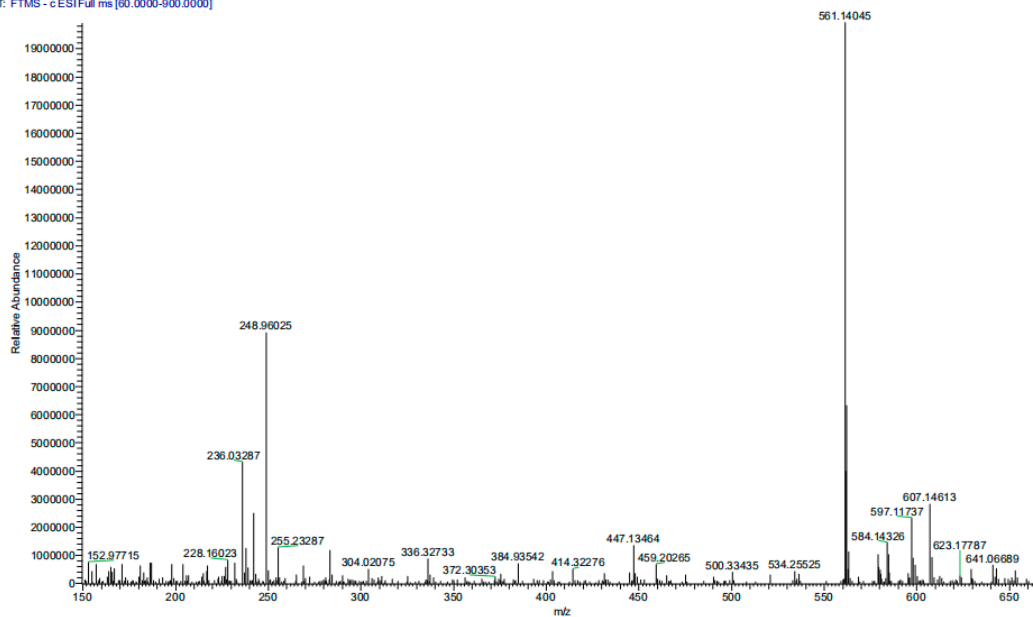

Figure S17. HRESIMS spectrum of the new compound **2**.

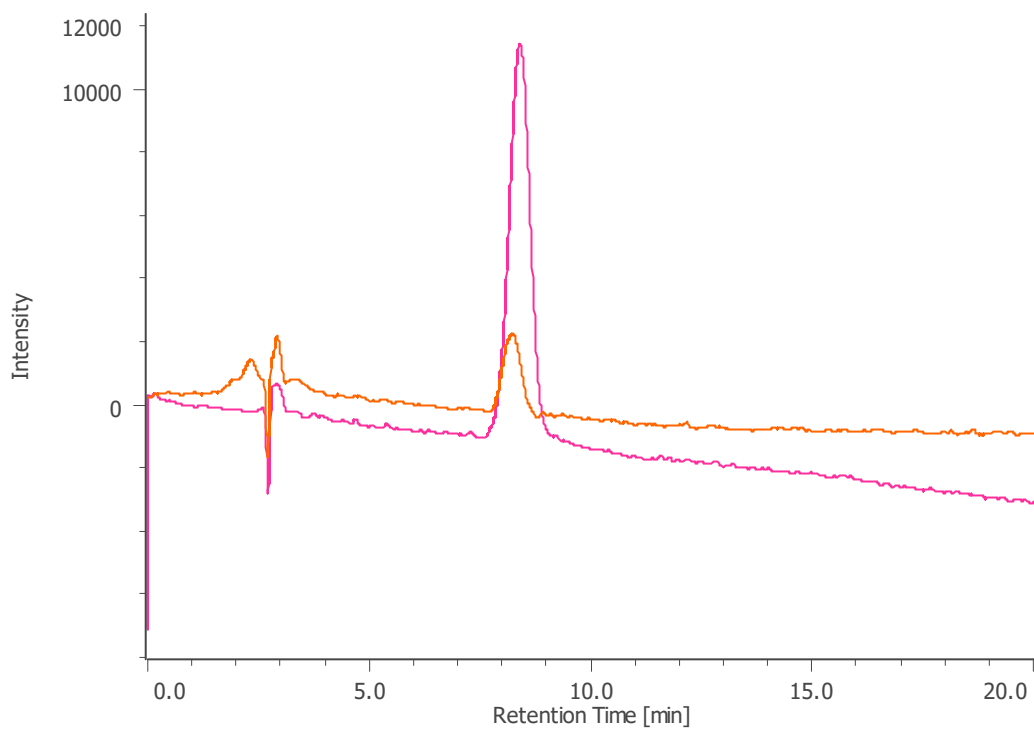

Figure S18. The chromatogram of the glucose standard and hydrolyzation product of

**2**

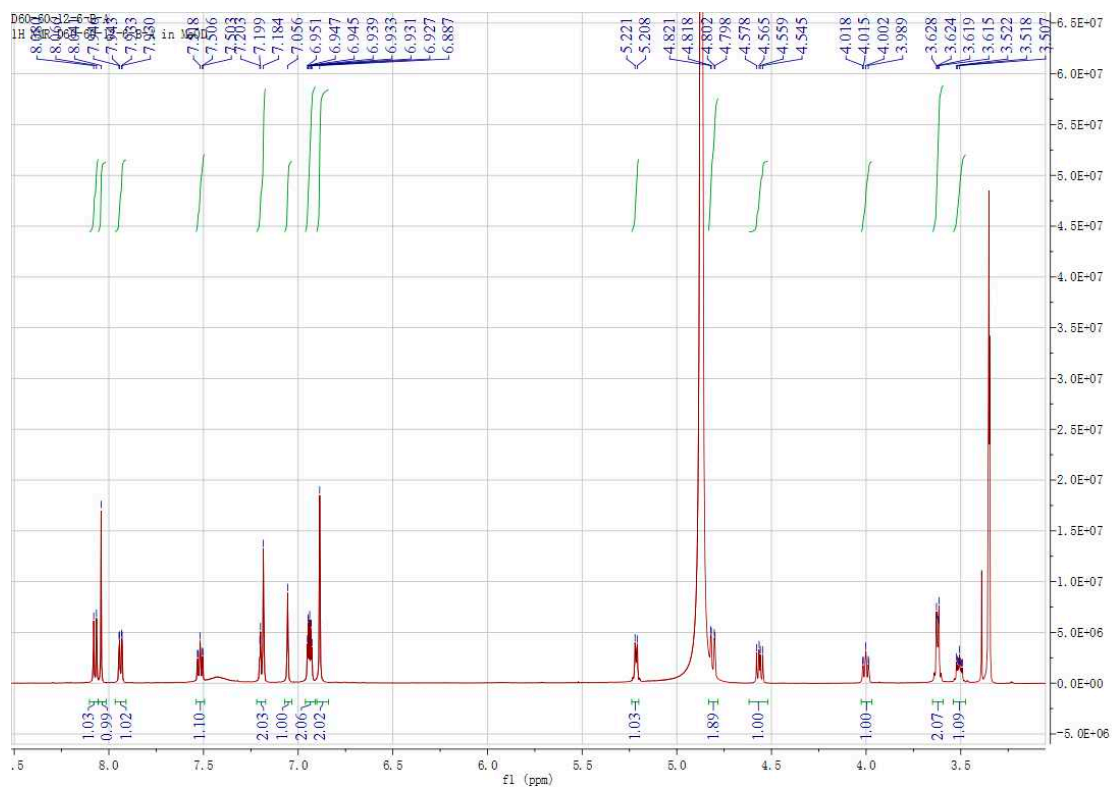

Figure S19.  $^1\text{H}$  NMR (600 MHz,  $\text{CD}_3\text{OD}$ ) spectrum of the new compound **3**.

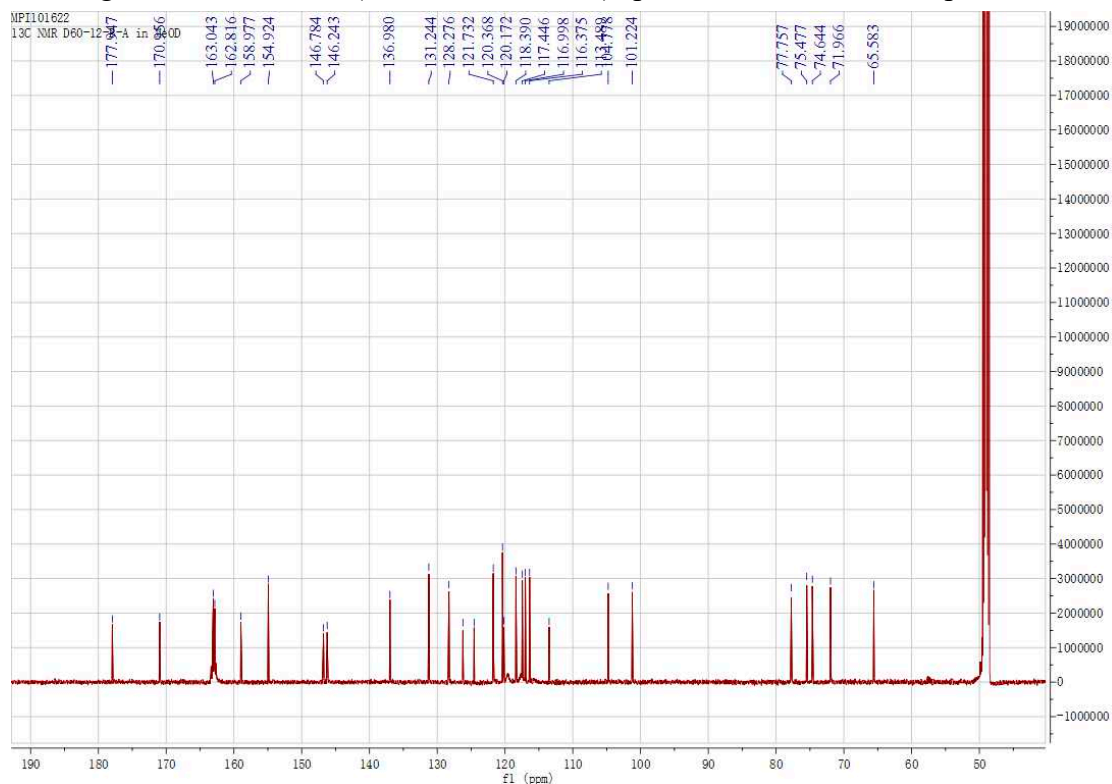

Figure S20.  $^{13}\text{C}$  NMR (150 MHz,  $\text{CD}_3\text{OD}$ ) spectrum of the new compound **3**.

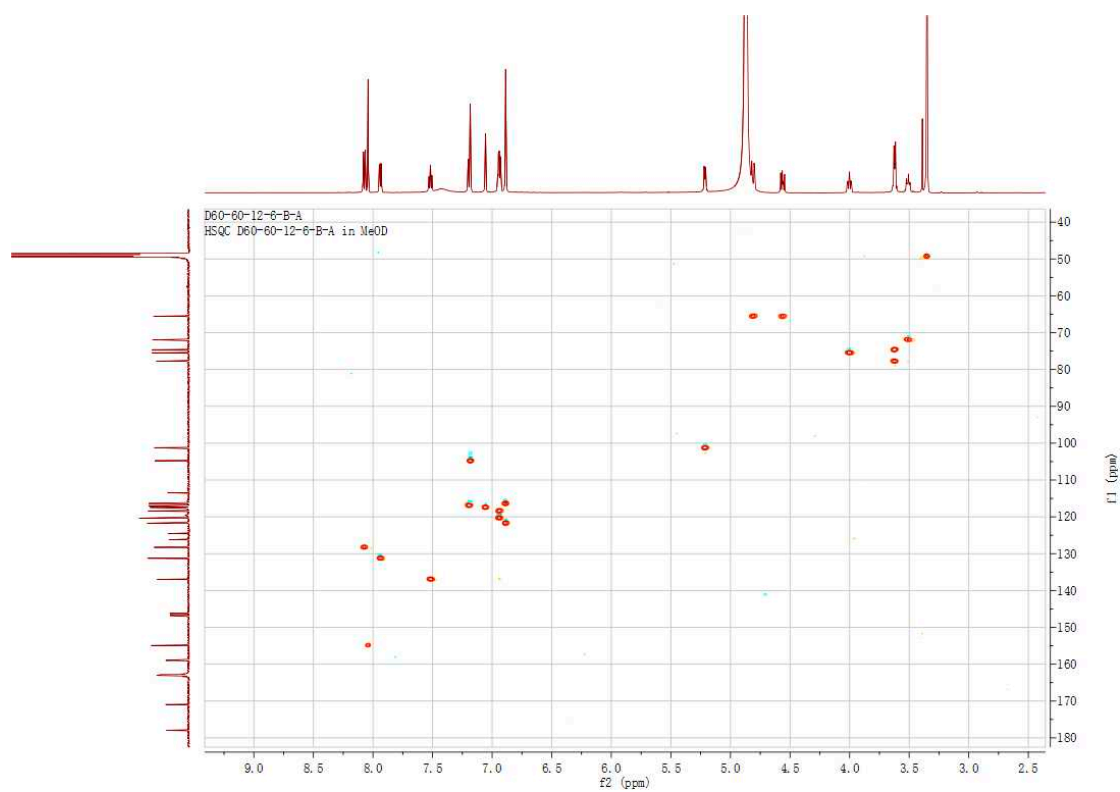

Figure S21. HSQC spectrum of the new compound **3**.

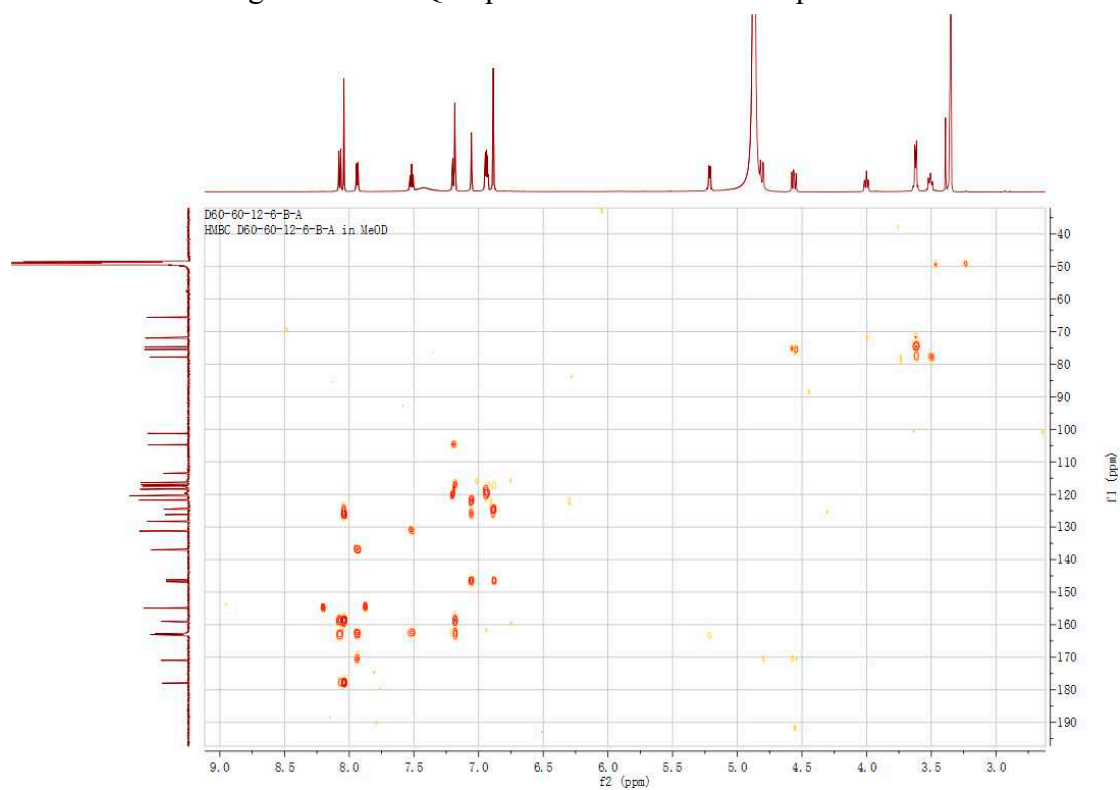

Figure S22. HMBC spectrum of the new compound **3**.

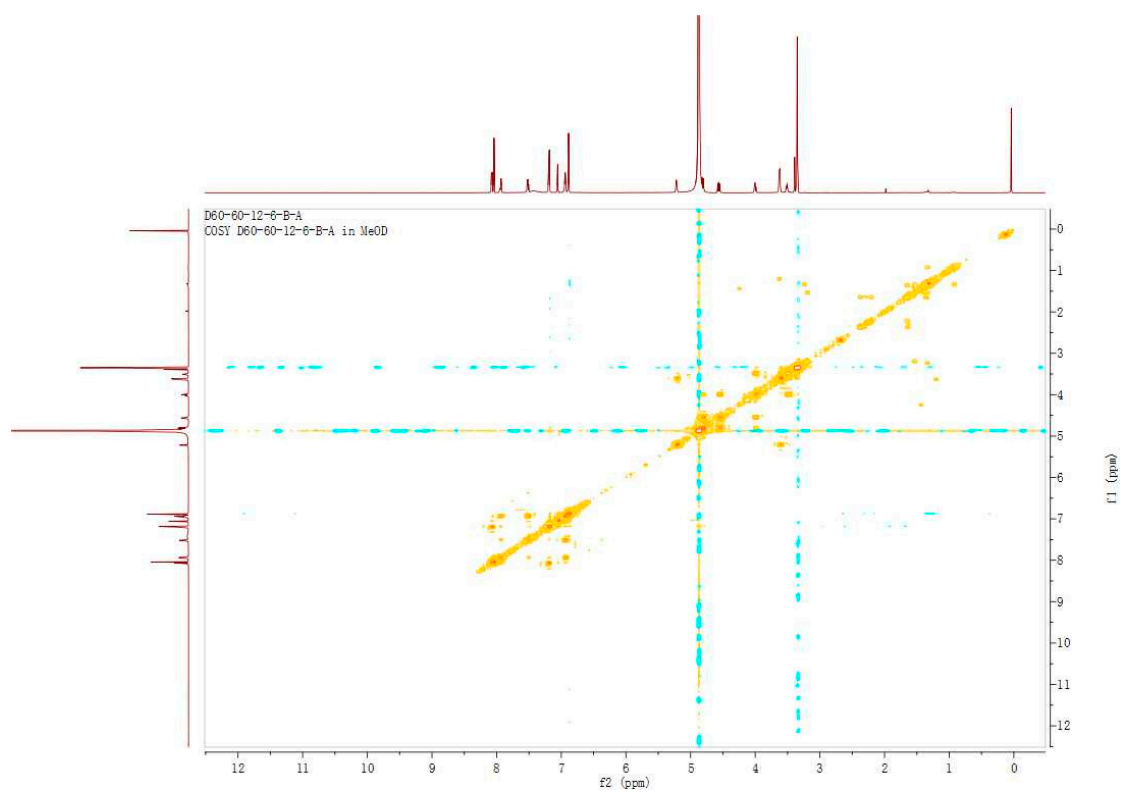

Figure S23. <sup>1</sup>H-<sup>1</sup>H COSY spectrum of the new compound **3**.

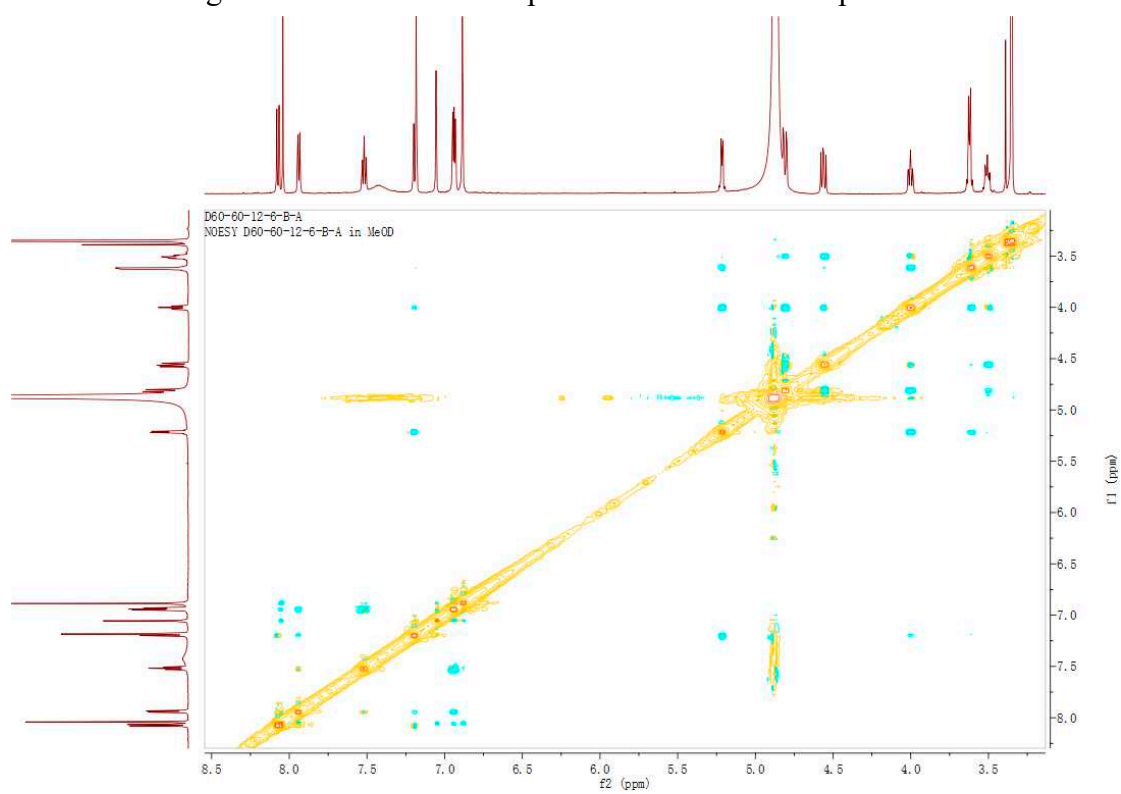

Figure S24. NOESY spectrum of the new compound **3**.

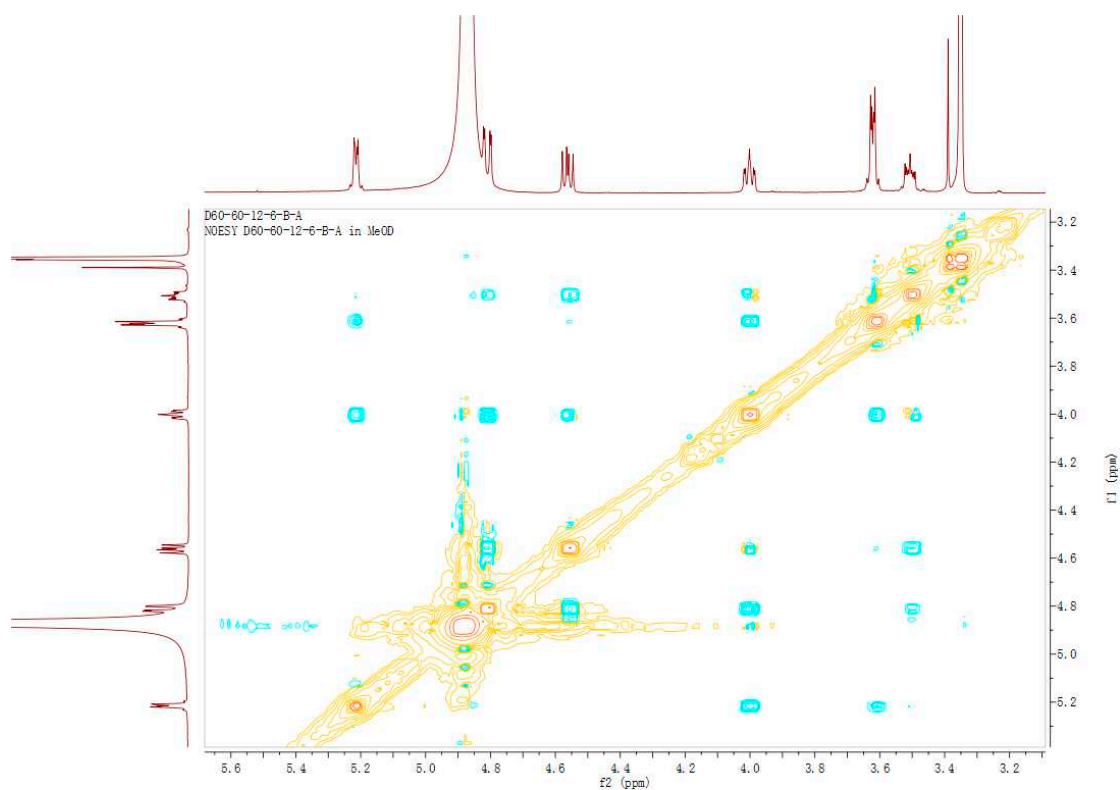

Figure S25. Enlarged NOESY spectrum of the new compound **3**.

7\_20190618144941 #15 RT: 0.15 AV: 1 SB: 22 0.65-0.84, 1.01-1.24 NL: 1.56E8  
T: FTMS + c ESI Fullms [0.0000-900.0000]

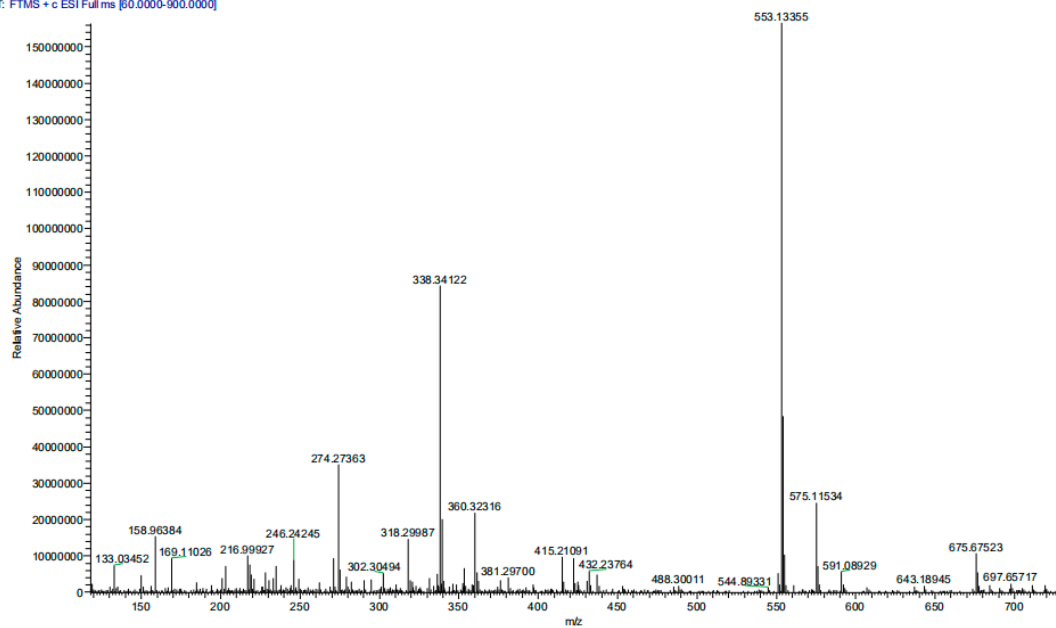

Figure S26. HRESIMS spectrum of the new compound **3**.

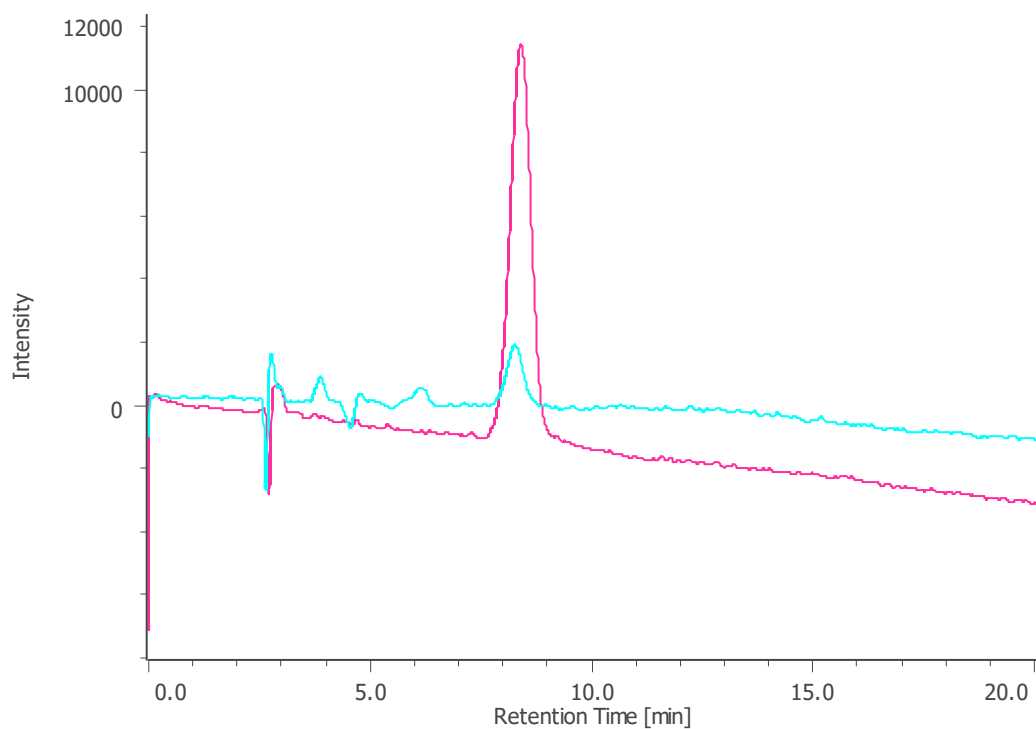

Figure S27. The chromatogram of the glucose standard and hydrolyzation product of

**3**

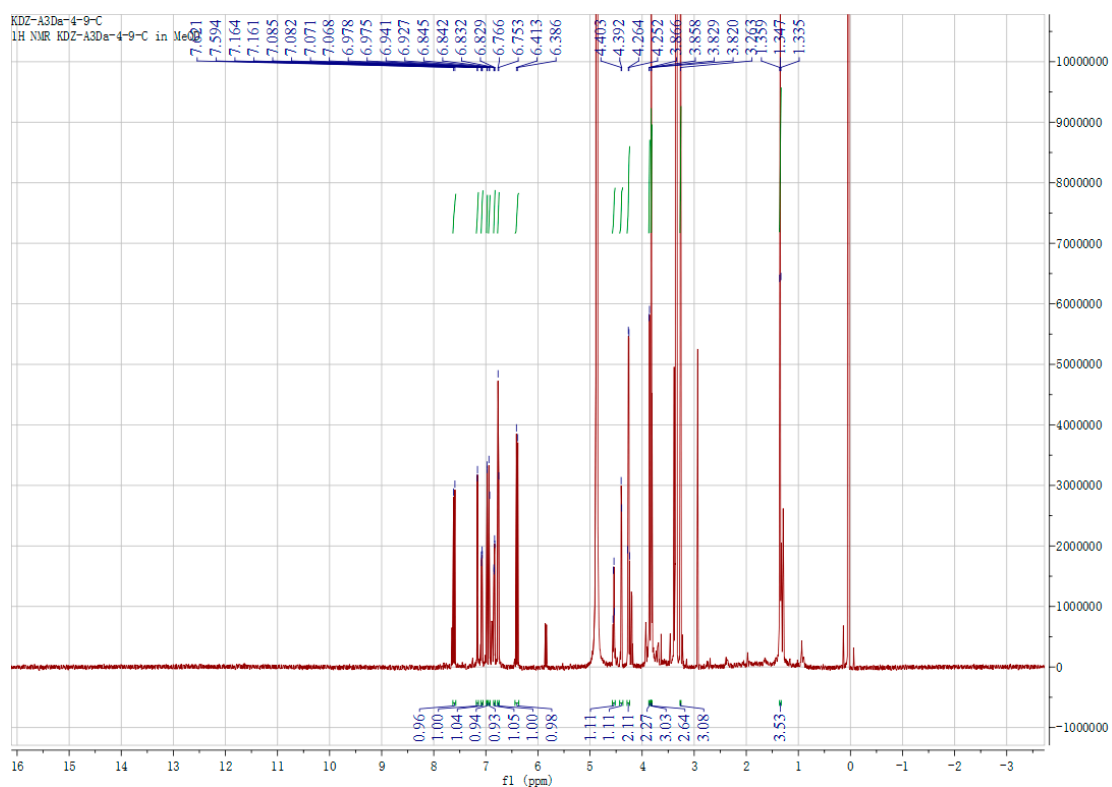

Figure S28.  $^1\text{H}$  NMR (600 MHz,  $\text{CD}_3\text{OD}$ ) spectrum of the new compound **4**.

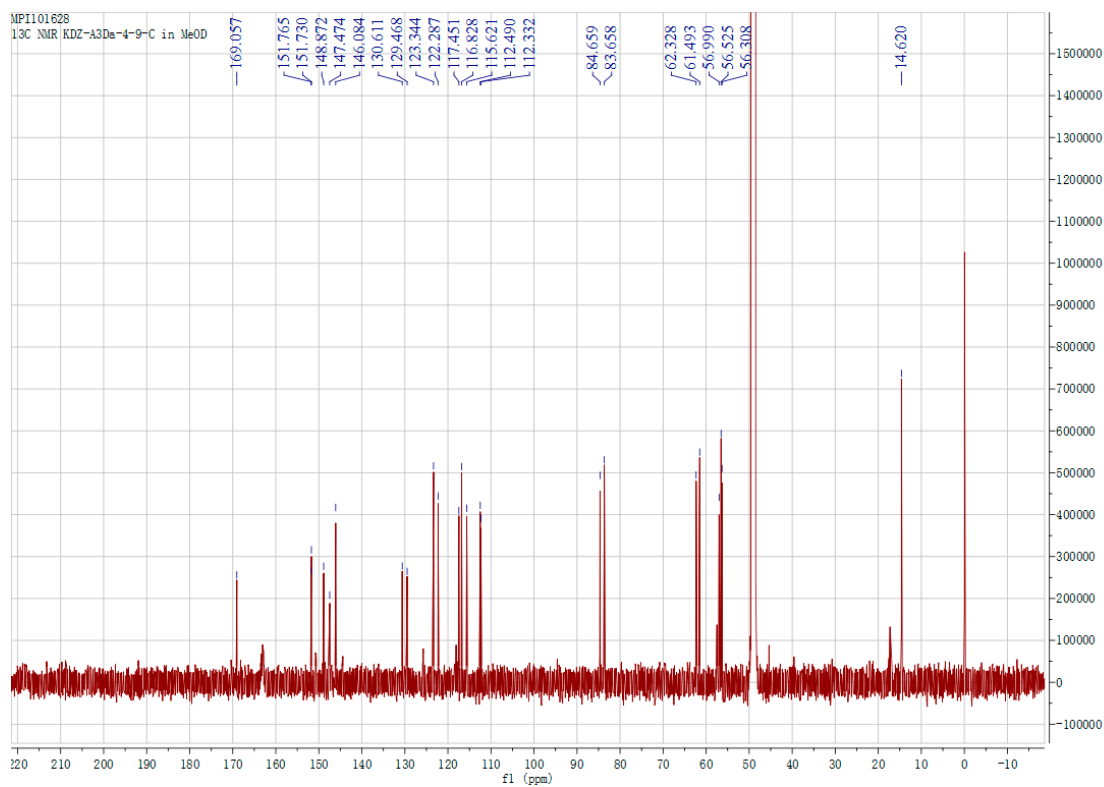

Figure S29. <sup>13</sup>C NMR (150 MHz, CD<sub>3</sub>OD) spectrum of the new compound **4**.

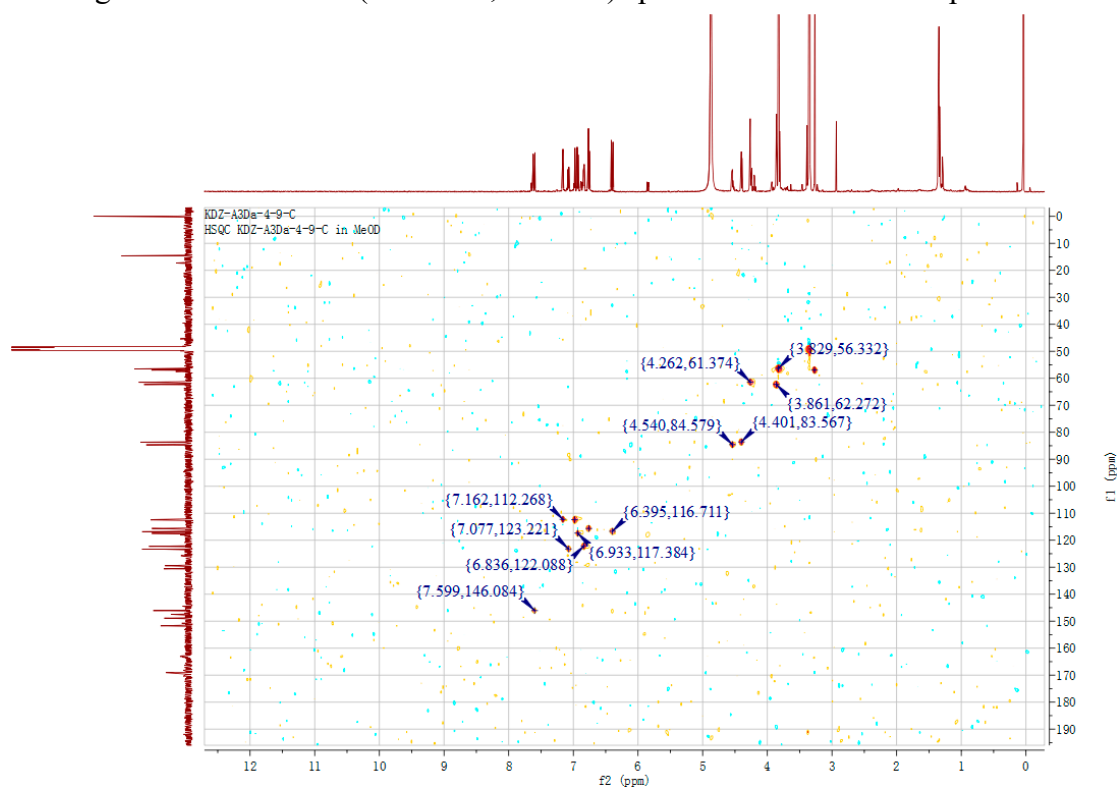

Figure S30. HSQC spectrum of the new compound **4**.



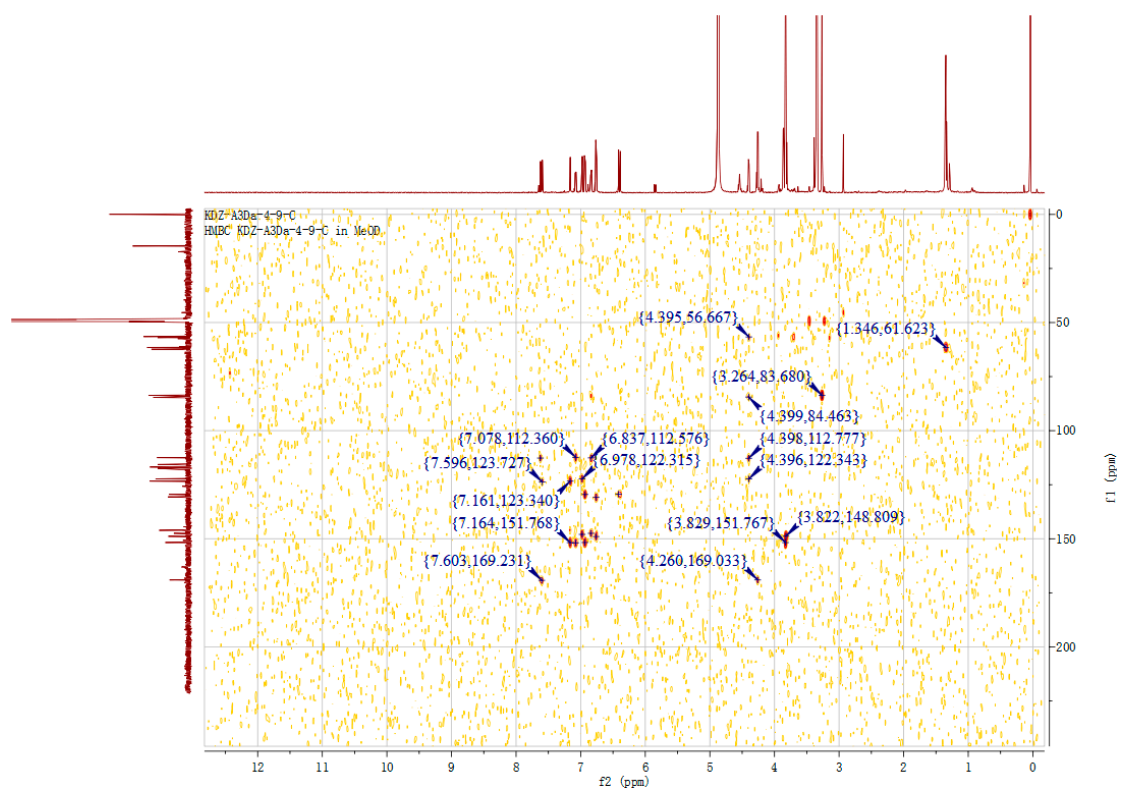

Figure S31. HMBC spectrum of the new compound 4.

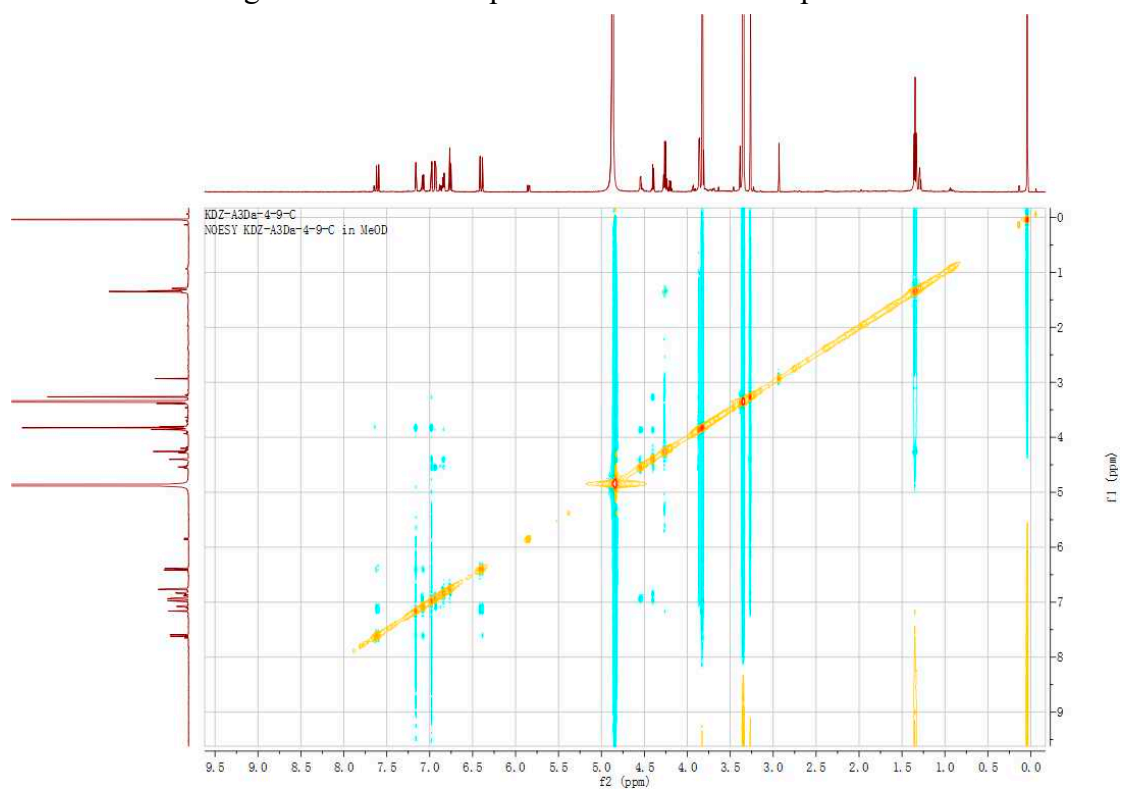

Figure S32. NOESY spectrum of the new compound 4.

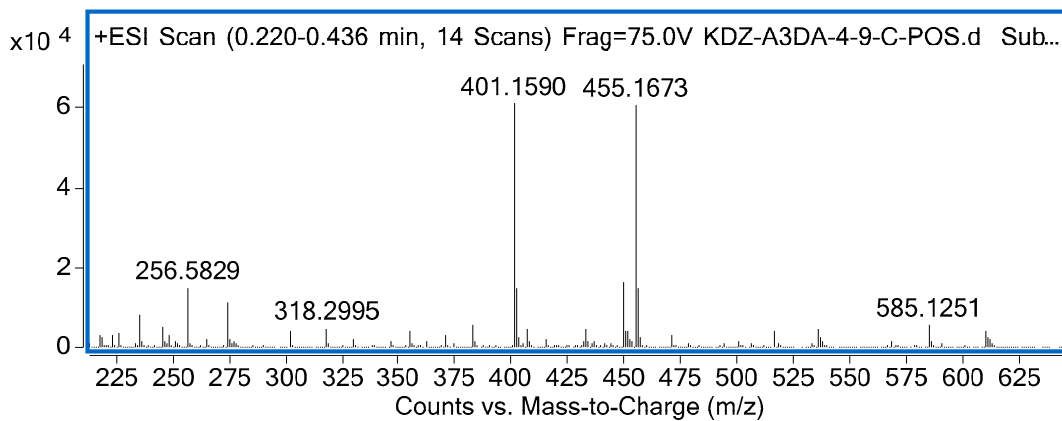

Figure S33. HRESIMS spectrum of the new compound 4.

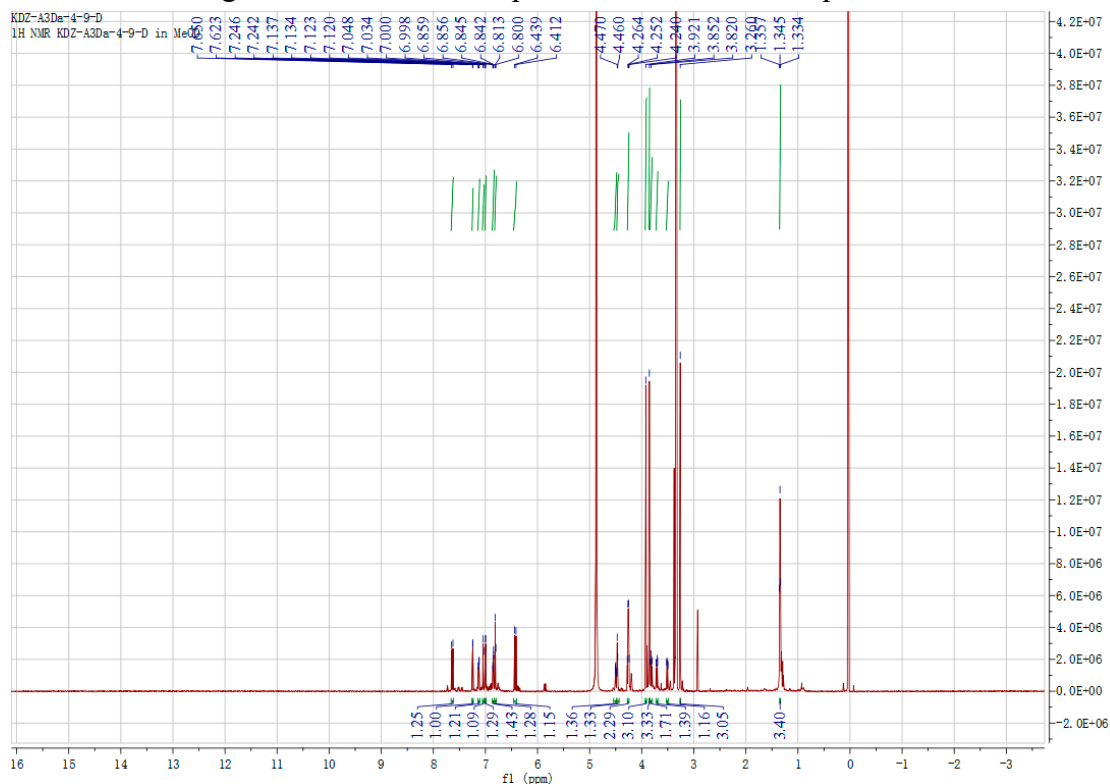

Figure S34. <sup>1</sup>H NMR (600 MHz, CD<sub>3</sub>OD) spectrum of the new compound 5.

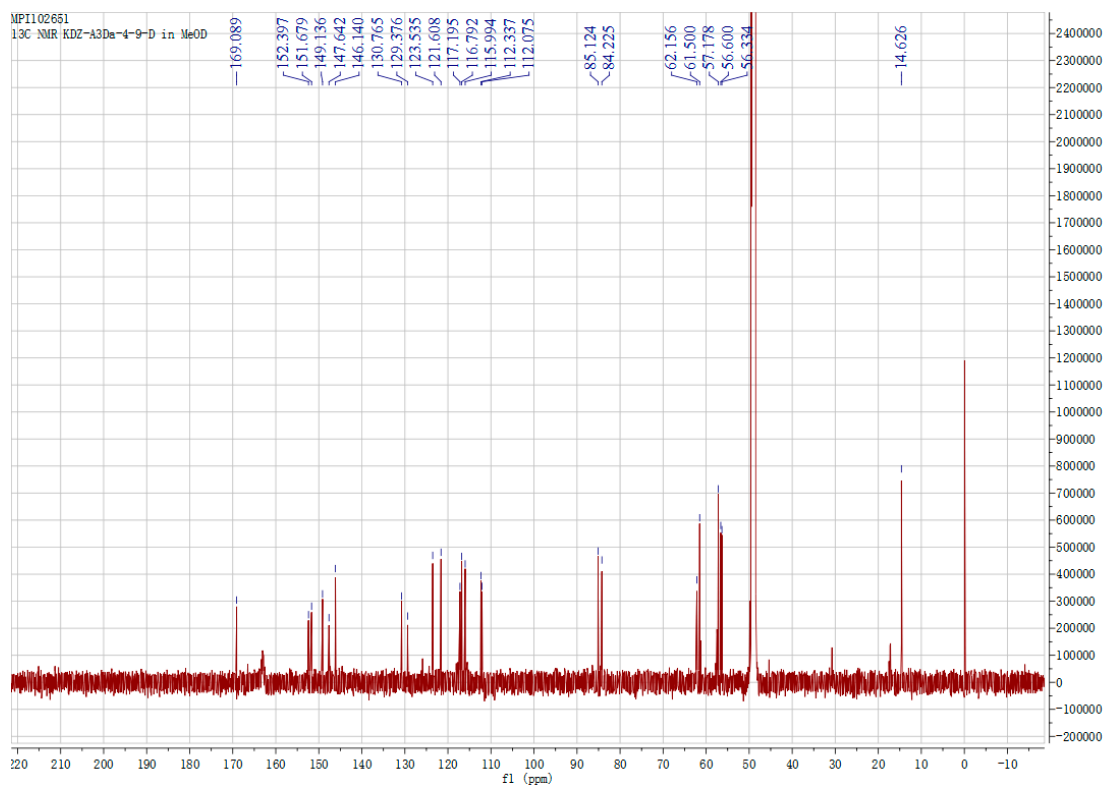

Figure S35. <sup>13</sup>C NMR (150 MHz, CD<sub>3</sub>OD) spectrum of the new compound **5**.

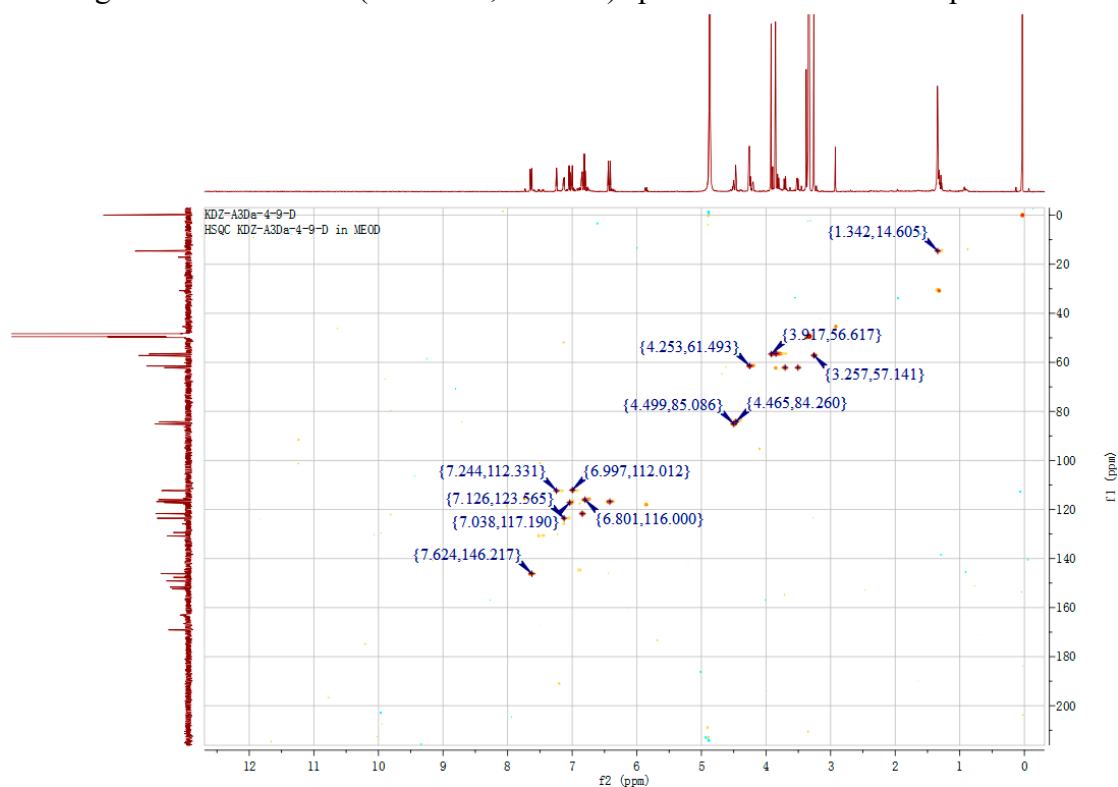

Figure S36. HSQC spectrum of the new compound **5**.

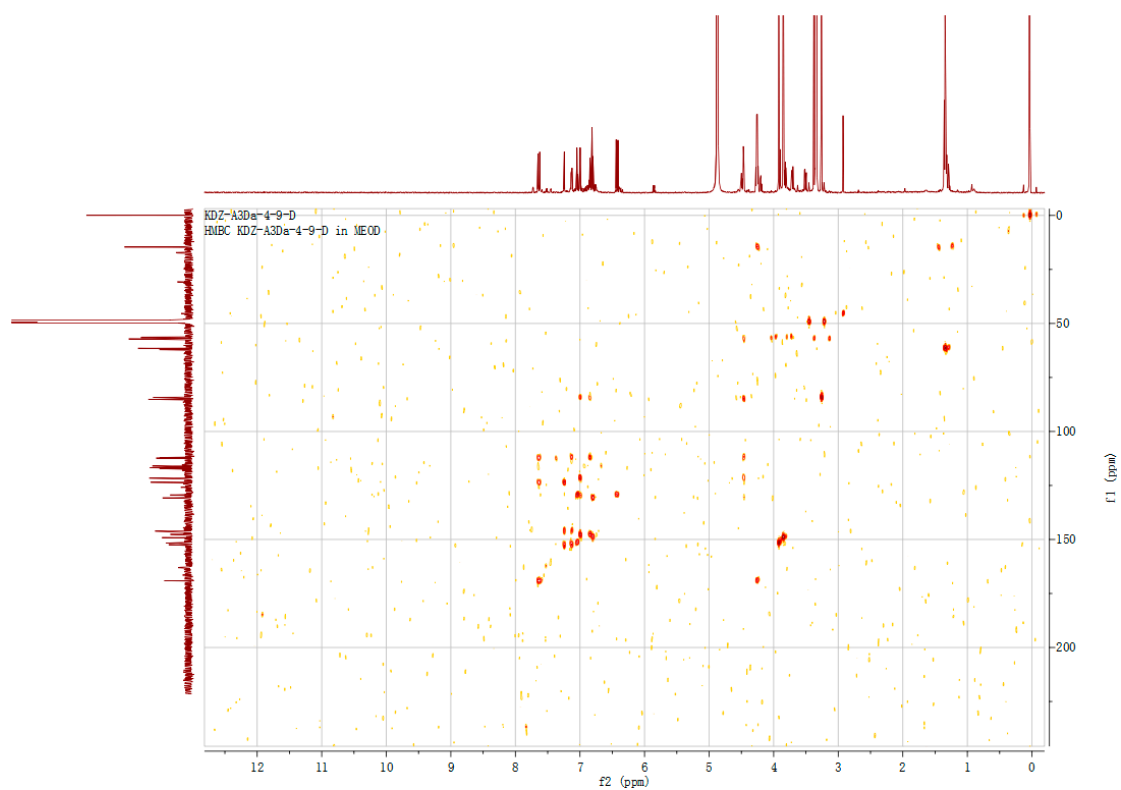

Figure S37. HMBC spectrum of the new compound **5**.

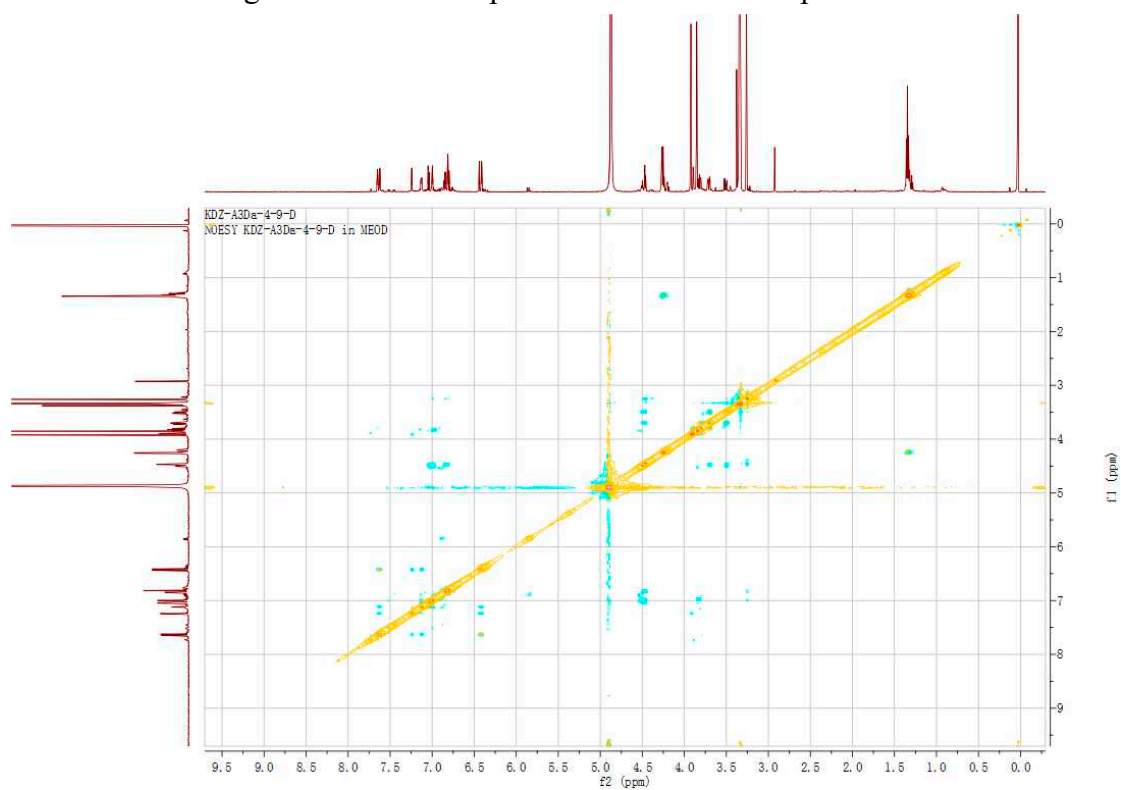

Figure S38. NOESY spectrum of the new compound **5**.

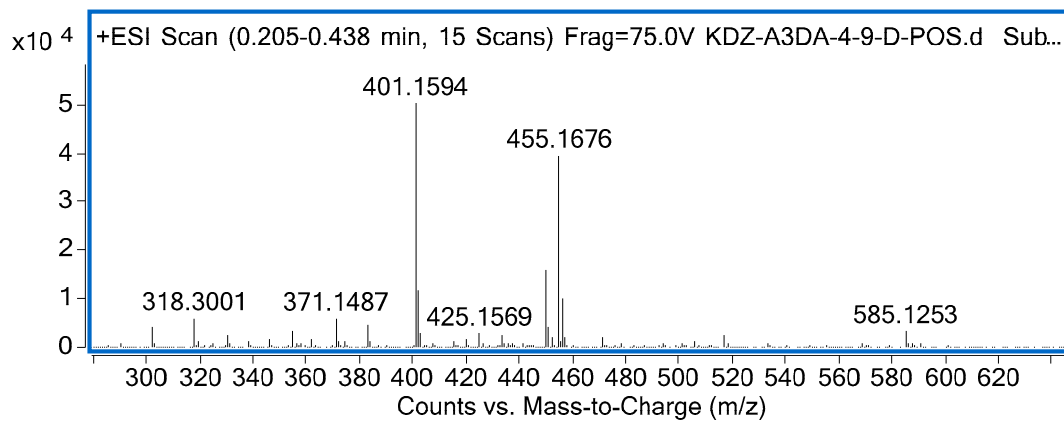

Figure S39. HRESIMS spectrum of the new compound **5**.
